# Supplementary material
Source: PubMed Central journal article supplement (PMC5592727)

## **ONLINE RESOURCE**

### **Breast tumor DNA methylation patterns associated with smoking in the Carolina Breast Cancer Study**

Kathleen Conway, Sharon N. Edmiston, Eloise Parrish, Christopher Bryant, Chiu-Kit Tse, Theresa Swift-Scanlan, Lauren E. McCullough, Pei Fen Kuan

**Table S1. CpG loci differentially methylated at p<0.05 in current vs. never smokers by HR status.**

| Probe                                                | CpG ID     | Chr | Mean Beta Never | Coefficient <u>Current vs. never</u> | Mean Beta <u>Current</u> | % Change vs Never | p-value      | FDR-adjusted p-value | Coefficient <u>Former vs. never</u> | Mean Beta <u>Former</u> | p-value      | FDR-adjusted p-value | Coefficient <u>Ever vs. never</u> | Mean Beta <u>Ever</u> | p-value      | FDR-adjusted p-value |
|------------------------------------------------------|------------|-----|-----------------|--------------------------------------|--------------------------|-------------------|--------------|----------------------|-------------------------------------|-------------------------|--------------|----------------------|-----------------------------------|-----------------------|--------------|----------------------|
| <b>HR- (n=107 CpGs in current vs never smokers )</b> |            |     |                 |                                      |                          |                   |              |                      |                                     |                         |              |                      |                                   |                       |              |                      |
| CDKN1A_P242_F                                        | cg23305046 | 6   | 0.0652          | 2.210                                | 0.0901                   | 38.19             | <b>0.000</b> | <b>0.000</b>         | 0.827                               | 0.0626                  | 0.104        | 0.446                | 1.345                             | 0.0770                | <b>0.000</b> | <b>0.067</b>         |
| IL12B_E25_F                                          | cg18307303 | 5   | 0.8696          | -0.465                               | 0.8314                   | -4.39             | <b>0.000</b> | <b>0.065</b>         | -0.296                              | 0.8497                  | <b>0.012</b> | 0.286                | -0.373                            | 0.8401                | <b>0.000</b> | <b>0.076</b>         |
| MCC_P196_R                                           | cg19728002 | 5   | 0.0541          | -0.820                               | 0.0476                   | -12.01            | <b>0.000</b> | 0.122                | -0.405                              | 0.0408                  | 0.077        | 0.411                | -0.624                            | 0.0443                | <b>0.000</b> | 0.120                |
| FGF1_P357_R                                          | cg05353098 | 5   | 0.6871          | -0.517                               | 0.5879                   | -14.44            | <b>0.000</b> | 0.132                | -0.125                              | 0.6694                  | 0.414        | 0.684                | -0.324                            | 0.6270                | <b>0.008</b> | 0.267                |
| PIK3R1_P307_F                                        | cg03473299 | 5   | 0.9073          | -0.353                               | 0.8838                   | -2.59             | <b>0.001</b> | 0.132                | 0.007                               | 0.9037                  | 0.955        | 0.984                | -0.174                            | 0.8933                | 0.051        | 0.377                |
| TRIM29_E189_F                                        | cg26414304 | 11  | 0.7605          | -0.491                               | 0.6870                   | -9.66             | <b>0.001</b> | 0.184                | -0.212                              | 0.7234                  | 0.173        | 0.520                | -0.347                            | 0.7045                | <b>0.006</b> | 0.251                |
| ACVR1_P983_F                                         | cg10122840 | 2   | 0.8544          | -0.473                               | 0.7959                   | -6.85             | <b>0.001</b> | 0.199                | -0.177                              | 0.8347                  | 0.266        | 0.591                | -0.330                            | 0.8145                | <b>0.009</b> | 0.268                |
| MAPK9_P1175_F                                        | cg05023457 | 5   | 0.9145          | -0.402                               | 0.8878                   | -2.92             | <b>0.002</b> | 0.231                | -0.094                              | 0.9066                  | 0.527        | 0.763                | -0.250                            | 0.8968                | <b>0.030</b> | 0.336                |
| MC2R_P1025_F                                         | cg00358505 | 18  | 0.4793          | -0.490                               | 0.4090                   | -14.67            | <b>0.003</b> | 0.251                | -0.257                              | 0.4467                  | 0.108        | 0.448                | -0.374                            | 0.4271                | <b>0.004</b> | 0.251                |
| APBA1_E99_R                                          | cg18505908 | 9   | 0.1270          | 0.434                                | 0.1622                   | 27.72             | <b>0.003</b> | 0.251                | -0.096                              | 0.1272                  | 0.588        | 0.810                | 0.178                             | 0.1454                | 0.174        | 0.520                |
| CYP2E1_E53_R                                         | cg23093817 | 10  | 0.7554          | -0.457                               | 0.6742                   | -10.75            | <b>0.003</b> | 0.251                | -0.278                              | 0.7111                  | 0.086        | 0.421                | -0.371                            | 0.6919                | <b>0.005</b> | 0.251                |
| ZIM3_P451_R                                          | cg16859188 | 19  | 0.9297          | -0.433                               | 0.9104                   | -2.08             | <b>0.004</b> | 0.251                | -0.057                              | 0.9262                  | 0.743        | 0.885                | -0.231                            | 0.9180                | 0.077        | 0.411                |
| DSC2_P407_R                                          | cg20887958 | 18  | 0.8565          | -0.392                               | 0.8149                   | -4.86             | <b>0.004</b> | 0.251                | -0.241                              | 0.8242                  | 0.086        | 0.421                | -0.316                            | 0.8194                | <b>0.006</b> | 0.251                |
| CDM_seq_21_S260_R                                    | cg18682265 | X   | 0.3964          | -0.382                               | 0.3251                   | -17.99            | <b>0.005</b> | 0.251                | -0.155                              | 0.3597                  | 0.222        | 0.554                | -0.269                            | 0.3417                | <b>0.010</b> | 0.271                |
| EPHA2_P340_R                                         | cg20350808 | 1   | 0.4335          | -0.365                               | 0.3549                   | -18.13            | <b>0.005</b> | 0.251                | -0.136                              | 0.3935                  | 0.277        | 0.594                | -0.252                            | 0.3734                | <b>0.013</b> | 0.298                |
| BMPR1A_E88_F                                         | cg14602437 | 10  | 0.7188          | -0.334                               | 0.6564                   | -8.68             | <b>0.005</b> | 0.251                | -0.113                              | 0.6920                  | 0.367        | 0.651                | -0.227                            | 0.6735                | <b>0.022</b> | 0.317                |
| FRK_P258_F                                           | cg26557270 | 6   | 0.6436          | -0.487                               | 0.5366                   | -16.63            | <b>0.005</b> | 0.251                | -0.160                              | 0.6165                  | 0.369        | 0.653                | -0.326                            | 0.5749                | <b>0.022</b> | 0.317                |
| MAP3K8_P1036_F                                       | cg21555918 | 10  | 0.6421          | -0.418                               | 0.5836                   | -9.11             | <b>0.005</b> | 0.251                | -0.293                              | 0.5777                  | 0.050        | 0.377                | -0.356                            | 0.5808                | <b>0.003</b> | 0.251                |
| MST1R_E42_R                                          | cg03714052 | 3   | 0.5684          | -0.440                               | 0.4522                   | -20.44            | <b>0.005</b> | 0.251                | -0.116                              | 0.5458                  | 0.458        | 0.709                | -0.279                            | 0.4970                | <b>0.028</b> | 0.332                |
| UGT1A1_E11_F                                         | cg03607648 | 2   | 0.9567          | -0.369                               | 0.9490                   | -0.80             | <b>0.006</b> | 0.251                | -0.121                              | 0.9542                  | 0.413        | 0.684                | -0.242                            | 0.9515                | <b>0.036</b> | 0.351                |
| SNCG_P98_R                                           | cg03677069 | 10  | 0.6472          | -0.372                               | 0.5833                   | -9.87             | <b>0.006</b> | 0.251                | -0.105                              | 0.6202                  | 0.446        | 0.705                | -0.240                            | 0.6010                | <b>0.030</b> | 0.336                |
| ITGA6_P718_R                                         | cg03085296 | 2   | 0.9225          | -0.363                               | 0.9003                   | -2.41             | <b>0.006</b> | 0.251                | -0.202                              | 0.9071                  | 0.150        | 0.498                | -0.283                            | 0.9036                | <b>0.012</b> | 0.286                |
| RARA_E128_R                                          | cg00848035 | 17  | 0.2640          | -0.449                               | 0.1852                   | -29.85            | <b>0.006</b> | 0.251                | -0.316                              | 0.1954                  | <b>0.046</b> | 0.369                | -0.384                            | 0.1901                | <b>0.002</b> | 0.231                |
| MYCL1_P502_R                                         | cg27650434 | 1   | 0.1159          | -0.375                               | 0.0886                   | -23.55            | <b>0.007</b> | 0.253                | -0.225                              | 0.0996                  | 0.084        | 0.421                | -0.302                            | 0.0939                | <b>0.004</b> | 0.251                |
| HGF_P1293_R                                          | cg14690980 | 7   | 0.9236          | -0.383                               | 0.9071                   | -1.79             | <b>0.007</b> | 0.254                | -0.334                              | 0.8998                  | <b>0.015</b> | 0.298                | -0.356                            | 0.9036                | <b>0.002</b> | 0.231                |
| CSF2_P605_F                                          | cg21708430 | 5   | 0.8866          | -0.306                               | 0.8648                   | -2.46             | <b>0.007</b> | 0.259                | -0.151                              | 0.8771                  | 0.208        | 0.548                | -0.228                            | 0.8707                | <b>0.017</b> | 0.306                |
| ACVR1_E328_R                                         | cg09919801 | 2   | 0.7775          | -0.435                               | 0.6933                   | -10.83            | <b>0.008</b> | 0.259                | -0.171                              | 0.7431                  | 0.314        | 0.618                | -0.303                            | 0.7171                | <b>0.026</b> | 0.331                |
| BCL2L2_E172_F                                        | cg09582636 | 14  | 0.0962          | 0.287                                | 0.1083                   | 12.58             | <b>0.008</b> | 0.267                | 0.054                               | 0.0925                  | 0.662        | 0.848                | 0.177                             | 0.1008                | 0.060        | 0.385                |
| BGN_E282_R                                           | cg00993428 | X   | 0.7072          | -0.348                               | 0.6408                   | -9.39             | <b>0.009</b> | 0.268                | -0.161                              | 0.6805                  | 0.243        | 0.577                | -0.257                            | 0.6598                | <b>0.020</b> | 0.314                |
| CTSL_P264_R                                          | cg20035138 | 9   | 0.4556          | -0.359                               | 0.3768                   | -17.30            | <b>0.010</b> | 0.272                | -0.235                              | 0.4131                  | 0.087        | 0.425                | -0.297                            | 0.3942                | <b>0.007</b> | 0.259                |
| MCF2_E195_F                                          | cg20900840 | X   | 0.8476          | -0.352                               | 0.8090                   | -4.55             | <b>0.010</b> | 0.272                | -0.126                              | 0.8326                  | 0.382        | 0.663                | -0.236                            | 0.8203                | <b>0.040</b> | 0.356                |
| CTGF_P693_R                                          | cg15155239 | 6   | 0.8080          | -0.410                               | 0.7308                   | -9.55             | <b>0.011</b> | 0.277                | -0.033                              | 0.7999                  | 0.857        | 0.942                | -0.236                            | 0.7639                | 0.090        | 0.429                |
| EPHA2_P203_F                                         | cg15146752 | 1   | 0.5861          | -0.380                               | 0.5034                   | -14.11            | <b>0.011</b> | 0.277                | -0.097                              | 0.5584                  | 0.515        | 0.755                | -0.240                            | 0.5297                | <b>0.046</b> | 0.368                |
| SEPT9_P374_F                                         | cg11617283 | 17  | 0.4313          | -0.490                               | 0.3552                   | -17.64            | <b>0.012</b> | 0.286                | -0.157                              | 0.3750                  | 0.386        | 0.666                | -0.312                            | 0.3647                | <b>0.035</b> | 0.351                |
| HOXC6_P456_R                                         | cg02491017 | 12  | 0.2176          | -0.426                               | 0.1789                   | -17.78            | <b>0.013</b> | 0.298                | -0.288                              | 0.1830                  | 0.074        | 0.410                | -0.357                            | 0.1809                | <b>0.006</b> | 0.251                |
| RARRES1_P57_R                                        | cg12199224 | 3   | 0.7029          | -0.238                               | 0.6714                   | -4.48             | <b>0.014</b> | 0.298                | -0.115                              | 0.6642                  | 0.235        | 0.567                | -0.176                            | 0.6680                | <b>0.024</b> | 0.331                |
| PTHR1_E36_R                                          | cg21954799 | 3   | 0.9055          | -0.324                               | 0.8831                   | -2.47             | <b>0.014</b> | 0.298                | -0.171                              | 0.8950                  | 0.225        | 0.557                | -0.249                            | 0.8888                | <b>0.026</b> | 0.331                |
| CCKAR_P270_F                                         | cg12336680 | 4   | 0.8503          | -0.300                               | 0.7996                   | -5.96             | <b>0.014</b> | 0.298                | -0.261                              | 0.8182                  | <b>0.034</b> | 0.350                | -0.280                            | 0.8085                | <b>0.006</b> | 0.251                |
| VBP1_P12_R                                           | cg16091746 | X   | 0.5217          | -0.322                               | 0.4388                   | -15.89            | <b>0.015</b> | 0.298                | -0.032                              | 0.5138                  | 0.809        | 0.922                | -0.179                            | 0.4747                | 0.090        | 0.429                |
| GPC3_E72_F                                           | cg27496708 | X   | 0.7230          | -0.337                               | 0.6627                   | -8.34             | <b>0.015</b> | 0.298                | -0.230                              | 0.6613                  | 0.102        | 0.443                | -0.284                            | 0.6620                | <b>0.012</b> | 0.294                |
| CYP2E1_P416_F                                        | cg17336072 | 10  | 0.7988          | -0.410                               | 0.7473                   | -6.45             | <b>0.015</b> | 0.298                | -0.277                              | 0.7605                  | 0.108        | 0.448                | -0.344                            | 0.7536                | <b>0.014</b> | 0.298                |
| GUCY2D_P48_R                                         | cg18094470 | 17  | 0.3178          | 0.366                                | 0.3926                   | 23.54             | <b>0.015</b> | 0.298                | -0.027                              | 0.3096                  | 0.868        | 0.947                | 0.180                             | 0.3529                | 0.156        | 0.503                |

|                   |            |    |        |        |        |        |              |       |        |        |              |       |        |        |              |       |
|-------------------|------------|----|--------|--------|--------|--------|--------------|-------|--------|--------|--------------|-------|--------|--------|--------------|-------|
| SLC14A1_P369_R    | cg00377772 | 18 | 0.7573 | -0.343 | 0.7006 | -7.49  | <b>0.016</b> | 0.300 | -0.302 | 0.6927 | <b>0.032</b> | 0.344 | -0.322 | 0.6968 | <b>0.005</b> | 0.251 |
| TRIP6_P1090_F     | cg09357642 | 7  | 0.6303 | -0.349 | 0.5629 | -10.69 | <b>0.016</b> | 0.300 | -0.218 | 0.5761 | 0.129        | 0.472 | -0.283 | 0.5692 | <b>0.015</b> | 0.298 |
| HSPA2_P162_R      | cg05316932 | 14 | 0.8962 | -0.332 | 0.8717 | -2.73  | <b>0.017</b> | 0.305 | -0.208 | 0.8769 | 0.143        | 0.492 | -0.269 | 0.8742 | <b>0.020</b> | 0.314 |
| TRIM29_P135_F     | cg24593464 | 11 | 0.7623 | -0.339 | 0.7122 | -6.57  | <b>0.017</b> | 0.306 | -0.139 | 0.7379 | 0.348        | 0.641 | -0.239 | 0.7245 | <b>0.043</b> | 0.365 |
| SNURF_P78_F       | cg15999943 | 15 | 0.7719 | -0.364 | 0.7180 | -6.98  | <b>0.017</b> | 0.306 | -0.304 | 0.7151 | <b>0.044</b> | 0.368 | -0.334 | 0.7166 | <b>0.007</b> | 0.259 |
| LOX_P313_R        | cg08623535 | 5  | 0.2852 | -0.412 | 0.2234 | -21.67 | <b>0.017</b> | 0.307 | -0.293 | 0.2321 | 0.084        | 0.421 | -0.353 | 0.2276 | <b>0.009</b> | 0.267 |
| TDG_E129_F        | cg09857351 | 12 | 0.7800 | -0.302 | 0.7404 | -5.08  | <b>0.018</b> | 0.311 | -0.234 | 0.7432 | 0.071        | 0.404 | -0.267 | 0.7417 | <b>0.011</b> | 0.277 |
| MCAM_P265_R       | cg19017850 | 11 | 0.2808 | -0.333 | 0.2192 | -21.94 | <b>0.019</b> | 0.314 | -0.126 | 0.2398 | 0.349        | 0.641 | -0.231 | 0.2291 | <b>0.035</b> | 0.350 |
| VAMP8_P241_F      | cg05486094 | 2  | 0.5886 | -0.276 | 0.5422 | -7.88  | <b>0.020</b> | 0.314 | -0.164 | 0.5499 | 0.166        | 0.514 | -0.221 | 0.5459 | <b>0.021</b> | 0.316 |
| MAGEA1_P926_F     | cg03363189 | X  | 0.8920 | -0.380 | 0.8707 | -2.39  | <b>0.020</b> | 0.314 | -0.081 | 0.8857 | 0.652        | 0.842 | -0.227 | 0.8779 | 0.102        | 0.443 |
| S100A2_E36_R      | cg09232826 | 1  | 0.5736 | -0.357 | 0.5106 | -10.98 | <b>0.020</b> | 0.314 | -0.179 | 0.5473 | 0.242        | 0.576 | -0.268 | 0.5282 | <b>0.029</b> | 0.336 |
| SPI1_E205_F       | cg07675031 | 11 | 0.5855 | -0.251 | 0.5337 | -8.47  | <b>0.020</b> | 0.314 | -0.121 | 0.5627 | 0.264        | 0.591 | -0.186 | 0.5476 | <b>0.032</b> | 0.344 |
| HDAC7A_P344_F     | cg25755806 | 12 | 0.9108 | -0.371 | 0.8577 | -5.83  | <b>0.020</b> | 0.314 | 0.014  | 0.9095 | 0.945        | 0.983 | -0.218 | 0.8825 | 0.133        | 0.477 |
| PRKCDBP_P352_R    | cg21590521 | 11 | 0.2438 | -0.406 | 0.2049 | -16.00 | <b>0.020</b> | 0.314 | -0.182 | 0.2085 | 0.265        | 0.591 | -0.294 | 0.2066 | <b>0.027</b> | 0.332 |
| SNCG_P53_F        | cg12027410 | 10 | 0.6535 | -0.394 | 0.5725 | -12.39 | <b>0.021</b> | 0.317 | -0.284 | 0.5866 | 0.098        | 0.442 | -0.339 | 0.5792 | <b>0.015</b> | 0.298 |
| TYRO3_P366_F      | cg10391513 | 15 | 0.2479 | -0.323 | 0.1899 | -23.40 | <b>0.023</b> | 0.324 | -0.347 | 0.1844 | <b>0.018</b> | 0.311 | -0.335 | 0.1873 | <b>0.003</b> | 0.251 |
| ZP3_P220_F        | cg14667235 | 7  | 0.7647 | -0.354 | 0.7146 | -6.55  | <b>0.024</b> | 0.331 | -0.162 | 0.7282 | 0.318        | 0.621 | -0.256 | 0.7211 | <b>0.048</b> | 0.372 |
| GRPR_P200_R       | cg26196133 | X  | 0.7302 | -0.307 | 0.6812 | -6.71  | <b>0.025</b> | 0.331 | -0.258 | 0.6823 | 0.059        | 0.382 | -0.282 | 0.6817 | <b>0.011</b> | 0.278 |
| MECP2_P398_R      | cg04941592 | X  | 0.6285 | -0.306 | 0.5613 | -10.69 | <b>0.026</b> | 0.331 | -0.126 | 0.5945 | 0.364        | 0.649 | -0.218 | 0.5772 | 0.050        | 0.377 |
| PTPRH_P255_F      | cg17314748 | 19 | 0.8994 | -0.425 | 0.8834 | -1.78  | <b>0.026</b> | 0.331 | -0.226 | 0.8847 | 0.254        | 0.581 | -0.320 | 0.8840 | <b>0.045</b> | 0.368 |
| BRCA1_P835_R      | cg00579360 | 17 | 0.7037 | -0.325 | 0.6393 | -9.15  | <b>0.026</b> | 0.331 | -0.106 | 0.6819 | 0.486        | 0.731 | -0.217 | 0.6597 | 0.072        | 0.404 |
| KRT5_P308_F       | cg03540813 | 12 | 0.7591 | -0.286 | 0.7197 | -5.19  | <b>0.027</b> | 0.331 | -0.081 | 0.7401 | 0.549        | 0.779 | -0.185 | 0.7295 | 0.084        | 0.421 |
| HLA-F_E402_F      | cg19070841 | 6  | 0.0801 | -3.807 | 0.0551 | -31.21 | <b>0.027</b> | 0.331 | 2.058  | 0.0902 | <b>0.004</b> | 0.251 | -0.215 | 0.0719 | 0.524        | 0.760 |
| Xist_seq_80_S47_R | cg11717280 | X  | 0.8000 | -0.265 | 0.7703 | -3.71  | <b>0.027</b> | 0.332 | -0.176 | 0.7726 | 0.151        | 0.498 | -0.221 | 0.7714 | <b>0.025</b> | 0.331 |
| THBS2_E129_F      | cg05068443 | 6  | 0.1148 | 0.404  | 0.1601 | 39.46  | <b>0.028</b> | 0.332 | -0.193 | 0.0914 | 0.454        | 0.708 | 0.150  | 0.1272 | 0.380        | 0.662 |
| LEFTY2_P719_F     | cg09540507 | 1  | 0.8861 | -0.392 | 0.8578 | -3.19  | <b>0.029</b> | 0.336 | -0.119 | 0.8753 | 0.540        | 0.769 | -0.249 | 0.8662 | 0.103        | 0.443 |
| SERPIN5_P19_R     | cg22362057 | 18 | 0.7934 | -0.366 | 0.7329 | -7.63  | <b>0.030</b> | 0.336 | -0.019 | 0.7850 | 0.920        | 0.973 | -0.198 | 0.7578 | 0.166        | 0.513 |
| IL6_E168_F        | cg05401786 | 7  | 0.2455 | -0.284 | 0.2085 | -15.07 | <b>0.031</b> | 0.340 | -0.287 | 0.1887 | <b>0.034</b> | 0.349 | -0.285 | 0.1990 | <b>0.006</b> | 0.251 |
| EPHB1_E202_R      | cg23448029 | 3  | 0.7920 | -0.280 | 0.7537 | -4.84  | <b>0.031</b> | 0.341 | -0.128 | 0.7609 | 0.339        | 0.638 | -0.204 | 0.7572 | 0.057        | 0.378 |
| IL13_E75_R        | cg20391122 | 5  | 0.9255 | -0.281 | 0.9084 | -1.85  | <b>0.032</b> | 0.344 | -0.135 | 0.9184 | 0.336        | 0.635 | -0.211 | 0.9132 | 0.057        | 0.378 |
| KRT5_E196_R       | cg04254916 | 12 | 0.8843 | -0.349 | 0.8450 | -4.44  | <b>0.033</b> | 0.346 | -0.150 | 0.8696 | 0.394        | 0.671 | -0.253 | 0.8567 | 0.069        | 0.399 |
| FGF1_E5_F         | cg02259548 | 5  | 0.7991 | -0.305 | 0.7553 | -5.48  | <b>0.033</b> | 0.346 | -0.138 | 0.7774 | 0.359        | 0.648 | -0.223 | 0.7659 | 0.061        | 0.385 |
| HDAC5_E298_F      | cg08753986 | 17 | 0.4026 | -0.207 | 0.3697 | -8.17  | <b>0.033</b> | 0.346 | -0.203 | 0.3407 | <b>0.038</b> | 0.351 | -0.205 | 0.3558 | <b>0.008</b> | 0.267 |
| MCF2_P1024_R      | cg13637055 | X  | 0.8422 | -0.281 | 0.8169 | -3.00  | <b>0.034</b> | 0.349 | -0.152 | 0.8229 | 0.264        | 0.591 | -0.214 | 0.8198 | 0.051        | 0.377 |
| DNAJC15_P65_F     | cg05035143 | 13 | 0.8359 | -0.314 | 0.8021 | -4.04  | <b>0.034</b> | 0.349 | -0.270 | 0.7903 | 0.067        | 0.398 | -0.291 | 0.7964 | <b>0.016</b> | 0.301 |
| IGFBP7_P297_F     | cg10799769 | 4  | 0.4365 | -0.343 | 0.3782 | -13.36 | <b>0.034</b> | 0.350 | 0.003  | 0.4154 | 0.984        | 0.995 | -0.167 | 0.3960 | 0.186        | 0.532 |
| IL16_P93_R        | cg13639030 | 15 | 0.5989 | -0.306 | 0.5342 | -10.80 | <b>0.035</b> | 0.350 | -0.262 | 0.5388 | 0.072        | 0.404 | -0.284 | 0.5364 | <b>0.015</b> | 0.298 |
| TNK1_P221_F       | cg26000767 | 17 | 0.4806 | -0.295 | 0.4149 | -13.67 | <b>0.036</b> | 0.351 | -0.232 | 0.4169 | 0.099        | 0.442 | -0.263 | 0.4158 | <b>0.019</b> | 0.311 |
| PTHR1_P170_R      | cg04041000 | 3  | 0.8938 | -0.454 | 0.8619 | -3.57  | <b>0.036</b> | 0.351 | -0.279 | 0.8803 | 0.224        | 0.556 | -0.357 | 0.8707 | 0.052        | 0.377 |
| IRF7_P277_R       | cg01030720 | 11 | 0.1619 | 0.535  | 0.1952 | 20.57  | <b>0.036</b> | 0.351 | 0.204  | 0.1711 | 0.445        | 0.704 | 0.369  | 0.1836 | 0.085        | 0.421 |
| ESR1_E298_R       | cg17191385 | 6  | 0.1579 | -0.301 | 0.1226 | -22.36 | <b>0.037</b> | 0.351 | -0.405 | 0.1124 | <b>0.009</b> | 0.268 | -0.350 | 0.1178 | <b>0.002</b> | 0.231 |
| SLC5A8_P38_R      | cg13433302 | 12 | 0.2205 | -0.432 | 0.1668 | -24.35 | <b>0.037</b> | 0.351 | -0.150 | 0.1834 | 0.419        | 0.688 | -0.292 | 0.1748 | 0.057        | 0.378 |
| NBL1_E205_R       | cg21813747 | 1  | 0.7836 | -0.317 | 0.7437 | -5.09  | <b>0.037</b> | 0.351 | -0.046 | 0.7775 | 0.775        | 0.903 | -0.178 | 0.7599 | 0.157        | 0.503 |
| TNFRSF10D_P70_F   | cg04134048 | 8  | 0.4346 | 0.439  | 0.5100 | 17.35  | <b>0.037</b> | 0.351 | -0.264 | 0.3633 | 0.234        | 0.567 | 0.088  | 0.4398 | 0.609        | 0.822 |
| COL6A1_P283_F     | cg22734035 | 21 | 0.0398 | 0.497  | 0.0513 | 28.89  | <b>0.038</b> | 0.351 | -0.262 | 0.0288 | 0.518        | 0.758 | 0.238  | 0.0405 | 0.307        | 0.614 |
| DSG1_E292_F       | cg20099449 | 18 | 0.8737 | -0.228 | 0.8543 | -2.22  | <b>0.038</b> | 0.351 | -0.009 | 0.8736 | 0.942        | 0.982 | -0.121 | 0.8635 | 0.189        | 0.534 |
| IGFBP5_P9_R       | cg20419545 | 2  | 0.2434 | -0.322 | 0.1958 | -19.56 | <b>0.040</b> | 0.359 | -0.156 | 0.2265 | 0.295        | 0.608 | -0.238 | 0.2105 | <b>0.047</b> | 0.369 |
| HLA-DQA2_E93_F    | cg15869057 | 6  | 0.6858 | -0.228 | 0.6501 | -5.21  | <b>0.040</b> | 0.360 | -0.338 | 0.6117 | <b>0.002</b> | 0.231 | -0.283 | 0.6317 | <b>0.002</b> | 0.211 |

|                 |            |    |        |        |        |        |              |       |        |        |              |       |        |        |              |       |
|-----------------|------------|----|--------|--------|--------|--------|--------------|-------|--------|--------|--------------|-------|--------|--------|--------------|-------|
| SEPT9_P58_R     | cg05428394 | 17 | 0.6676 | -0.379 | 0.5901 | -11.61 | <b>0.041</b> | 0.360 | -0.077 | 0.6539 | 0.686        | 0.859 | -0.230 | 0.6207 | 0.130        | 0.472 |
| PRSS8_E134_R    | cg27436259 | 16 | 0.8046 | -0.299 | 0.7638 | -5.07  | <b>0.041</b> | 0.363 | -0.124 | 0.7861 | 0.422        | 0.692 | -0.213 | 0.7744 | 0.082        | 0.419 |
| MUSK_P308_F     | cg22051739 | 9  | 0.8136 | -0.242 | 0.7869 | -3.28  | <b>0.042</b> | 0.363 | -0.009 | 0.8143 | 0.946        | 0.984 | -0.128 | 0.8001 | 0.197        | 0.541 |
| FLJ20712_P984_R | cg05794098 | 7  | 0.6105 | -0.275 | 0.5540 | -9.25  | <b>0.043</b> | 0.365 | -0.480 | 0.4854 | <b>0.000</b> | 0.132 | -0.379 | 0.5211 | <b>0.001</b> | 0.145 |
| FANCE_P356_R    | cg04035266 | 6  | 0.2097 | 0.358  | 0.2577 | 22.89  | <b>0.043</b> | 0.368 | -0.391 | 0.1658 | 0.102        | 0.443 | 0.030  | 0.2137 | 0.850        | 0.940 |
| PDGFRA_E125_F   | cg20629161 | 4  | 0.5449 | -0.328 | 0.4732 | -13.16 | <b>0.044</b> | 0.368 | -0.293 | 0.4689 | 0.067        | 0.398 | -0.310 | 0.4711 | <b>0.016</b> | 0.301 |
| PMP22_P975_F    | cg08815822 | 17 | 0.8172 | -0.306 | 0.7851 | -3.93  | <b>0.044</b> | 0.368 | -0.112 | 0.7972 | 0.483        | 0.729 | -0.208 | 0.7909 | 0.099        | 0.443 |
| ATP10A_P147_F   | cg06932470 | 15 | 0.4014 | 0.364  | 0.4819 | 20.05  | <b>0.045</b> | 0.368 | 0.250  | 0.4529 | 0.171        | 0.518 | 0.307  | 0.4680 | <b>0.035</b> | 0.351 |
| RARRES1_P426_R  | cg13848998 | 3  | 0.5410 | -0.342 | 0.4686 | -13.38 | <b>0.045</b> | 0.368 | -0.266 | 0.4720 | 0.117        | 0.461 | -0.304 | 0.4702 | <b>0.026</b> | 0.331 |
| NTRK2_P10_F     | cg23399093 | 9  | 0.1405 | -0.449 | 0.1020 | -27.40 | <b>0.045</b> | 0.368 | -0.604 | 0.0908 | <b>0.015</b> | 0.298 | -0.524 | 0.0967 | <b>0.004</b> | 0.251 |
| TNC_P57_F       | cg01250769 | 9  | 0.1516 | -0.269 | 0.1260 | -16.89 | <b>0.045</b> | 0.368 | -0.123 | 0.1288 | 0.346        | 0.641 | -0.199 | 0.1273 | 0.056        | 0.378 |
| GLI3_E148_R     | cg12211443 | 7  | 0.8793 | -0.386 | 0.8487 | -3.48  | <b>0.045</b> | 0.368 | -0.336 | 0.8521 | 0.083        | 0.421 | -0.361 | 0.8503 | <b>0.024</b> | 0.331 |
| G6PD_P597_F     | cg26178557 | X  | 0.7432 | -0.281 | 0.6902 | -7.13  | <b>0.046</b> | 0.368 | -0.195 | 0.7051 | 0.171        | 0.518 | -0.239 | 0.6973 | <b>0.038</b> | 0.351 |
| SFTPC_E13_F     | cg11540705 | 8  | 0.7611 | -0.253 | 0.7124 | -6.40  | <b>0.047</b> | 0.369 | -0.189 | 0.7350 | 0.138        | 0.484 | -0.220 | 0.7233 | <b>0.033</b> | 0.346 |
| USP29_P282_R    | cg16675193 | 19 | 0.8961 | -0.224 | 0.8854 | -1.19  | <b>0.047</b> | 0.369 | -0.063 | 0.8918 | 0.599        | 0.815 | -0.143 | 0.8885 | 0.128        | 0.472 |
| VBP1_E127_F     | cg10528799 | X  | 0.7240 | -0.297 | 0.6511 | -10.07 | <b>0.048</b> | 0.371 | -0.338 | 0.6569 | <b>0.023</b> | 0.324 | -0.318 | 0.6539 | <b>0.009</b> | 0.268 |
| MMP7_P613_F     | cg20645973 | 11 | 0.8465 | -0.205 | 0.8296 | -2.00  | <b>0.048</b> | 0.372 | 0.065  | 0.8532 | 0.573        | 0.798 | -0.077 | 0.8409 | 0.384        | 0.664 |

**HR+** (n=22 CpGs in current vs never smokers)

|                 |            |    |        |        |        |       |              |       |        |        |              |       |        |        |              |       |
|-----------------|------------|----|--------|--------|--------|-------|--------------|-------|--------|--------|--------------|-------|--------|--------|--------------|-------|
| FRZB_E186_R     | cg01872931 | 2  | 0.3326 | 0.541  | 0.4163 | 25.17 | <b>0.001</b> | 0.568 | 0.097  | 0.3447 | 0.540        | 0.998 | 0.305  | 0.3797 | <b>0.021</b> | 0.998 |
| MYCL1_P502_R    | cg27650434 | 1  | 0.0980 | 0.395  | 0.1349 | 37.65 | <b>0.003</b> | 0.998 | 0.436  | 0.1379 | <b>0.001</b> | 0.568 | 0.417  | 0.1365 | <b>0.000</b> | 0.550 |
| COL1A1_P117_R   | cg10100754 | 17 | 0.4786 | 0.366  | 0.5582 | 16.63 | <b>0.003</b> | 0.998 | 0.094  | 0.5032 | 0.429        | 0.998 | 0.223  | 0.5300 | <b>0.025</b> | 0.998 |
| CCNA1_E7_F      | cg27186533 | 13 | 0.3422 | 0.491  | 0.4265 | 24.63 | <b>0.007</b> | 0.998 | 0.308  | 0.4061 | 0.075        | 0.998 | 0.393  | 0.4161 | <b>0.007</b> | 0.998 |
| COL1A1_P5_F     | cg13069732 | 17 | 0.5696 | 0.361  | 0.6445 | 13.15 | <b>0.007</b> | 0.998 | 0.013  | 0.5777 | 0.915        | 0.998 | 0.175  | 0.6103 | 0.096        | 0.998 |
| IGF2AS_P203_F   | cg14188639 | 11 | 0.5979 | 0.375  | 0.6747 | 12.84 | <b>0.010</b> | 0.998 | 0.116  | 0.6134 | 0.388        | 0.998 | 0.234  | 0.6433 | <b>0.039</b> | 0.998 |
| TMEFF2_E94_R    | cg10026428 | 2  | 0.1812 | 0.393  | 0.2349 | 29.64 | <b>0.011</b> | 0.998 | 0.199  | 0.2093 | 0.201        | 0.998 | 0.291  | 0.2218 | <b>0.024</b> | 0.998 |
| TAL1_P817_F     | cg26891410 | 1  | 0.7654 | 0.322  | 0.8125 | 6.15  | <b>0.013</b> | 0.998 | 0.049  | 0.7714 | 0.665        | 0.998 | 0.176  | 0.7915 | 0.071        | 0.998 |
| BMP4_P199_R     | cg09229893 | 14 | 0.6169 | 0.354  | 0.6968 | 12.95 | <b>0.015</b> | 0.998 | 0.175  | 0.6525 | 0.190        | 0.998 | 0.257  | 0.6741 | <b>0.022</b> | 0.998 |
| IGF2_P1036_R    | cg04741015 | 11 | 0.1249 | 0.268  | 0.1543 | 23.54 | <b>0.015</b> | 0.998 | 0.053  | 0.1324 | 0.642        | 0.998 | 0.155  | 0.1431 | 0.093        | 0.998 |
| SERPINE1_P519_F | cg19722814 | 7  | 0.3282 | 0.252  | 0.3822 | 16.45 | <b>0.020</b> | 0.998 | 0.152  | 0.3530 | 0.151        | 0.998 | 0.200  | 0.3672 | <b>0.024</b> | 0.998 |
| CALCA_E174_R    | cg09068492 | 11 | 0.3740 | 0.319  | 0.4317 | 15.43 | <b>0.021</b> | 0.998 | 0.209  | 0.4204 | 0.120        | 0.998 | 0.261  | 0.4259 | <b>0.020</b> | 0.998 |
| PTPRO_E56_F     | cg23147819 | 12 | 0.0904 | 0.358  | 0.1053 | 16.48 | <b>0.024</b> | 0.998 | 0.105  | 0.0959 | 0.522        | 0.998 | 0.230  | 0.1005 | 0.085        | 0.998 |
| HLF_E192_F      | cg05876326 | 17 | 0.1001 | 0.438  | 0.1325 | 32.37 | <b>0.025</b> | 0.998 | 0.340  | 0.1340 | 0.075        | 0.998 | 0.382  | 0.1333 | <b>0.020</b> | 0.998 |
| RIPK3_P124_F    | cg13583230 | 14 | 0.5399 | 0.285  | 0.6001 | 11.15 | <b>0.026</b> | 0.998 | 0.133  | 0.5674 | 0.274        | 0.998 | 0.205  | 0.5834 | <b>0.044</b> | 0.998 |
| HOXA11_P92_R    | cg18977999 | 7  | 0.1876 | 0.296  | 0.2219 | 18.28 | <b>0.034</b> | 0.998 | 0.102  | 0.1950 | 0.464        | 0.998 | 0.192  | 0.2082 | 0.096        | 0.998 |
| TAL1_E122_F     | cg00875272 | 1  | 0.2406 | 0.301  | 0.2928 | 21.7  | <b>0.036</b> | 0.998 | 0.071  | 0.2550 | 0.630        | 0.998 | 0.182  | 0.2735 | 0.128        | 0.998 |
| OAT_P465_F      | cg10231486 | 10 | 0.1846 | 0.190  | 0.2070 | 12.13 | <b>0.036</b> | 0.998 | 0.029  | 0.1915 | 0.749        | 0.998 | 0.107  | 0.1991 | 0.154        | 0.998 |
| GFI1_P45_R      | cg07499339 | 1  | 0.3388 | 0.257  | 0.3695 | 9.06  | <b>0.037</b> | 0.998 | -0.080 | 0.3328 | 0.521        | 0.998 | 0.082  | 0.3507 | 0.419        | 0.998 |
| POMC_P53_F      | cg00293936 | 2  | 0.0847 | 0.341  | 0.1071 | 26.45 | <b>0.040</b> | 0.998 | 0.180  | 0.0918 | 0.275        | 0.998 | 0.255  | 0.0993 | 0.065        | 0.998 |
| OPCML_P71_F     | cg00738841 | 11 | 0.2895 | 0.212  | 0.3248 | 12.19 | <b>0.045</b> | 0.998 | 0.094  | 0.3048 | 0.367        | 0.998 | 0.151  | 0.3145 | 0.081        | 0.998 |
| HBI1-52_P659_F  | cg18037269 | 15 | 0.8875 | -0.225 | 0.8643 | -2.61 | <b>0.045</b> | 0.998 | -0.164 | 0.8709 | 0.140        | 0.998 | -0.193 | 0.8677 | <b>0.038</b> | 0.998 |

CpG loci differentially methylated in current versus never smokers at  $p < 0.05$  were identified from generalized linear models adjusted for age, menopausal status, race (AA vs. non-AA as appropriate), BMI (<25, 25-29, >29), average alcohol consumption (grams per week), and stage (ordinal, 1-4) in HR+ or HR- tumor subsets. Results for current smoking-associated loci are also shown in former and ever smokers.

**Table S2. Correlation of methylation with increasing duration of smoking or years since quitting at current smoking-associated CpG loci in HR- breast tumors**

| Probe             | Duration of smoking in years (ever smokers) |              | Years since quitting smoking (former smokers) |              |
|-------------------|---------------------------------------------|--------------|-----------------------------------------------|--------------|
|                   | Correlation Coefficient                     | p value      | Correlation Coefficient                       | p value      |
| RARA_E128_R       | -0.2600                                     | <b>0.001</b> | 0.2732                                        | <b>0.000</b> |
| HLF_E192_F        | -0.2590                                     | <b>0.001</b> | 0.2619                                        | <b>0.001</b> |
| TYRO3_P366_F      | -0.2419                                     | <b>0.002</b> | 0.2569                                        | <b>0.001</b> |
| ESR1_E298_R       | -0.2290                                     | <b>0.003</b> | 0.2407                                        | <b>0.002</b> |
| MST1R_E42_R       | -0.2133                                     | <b>0.006</b> | 0.2321                                        | <b>0.003</b> |
| EPHA2_P340_R      | -0.2229                                     | <b>0.004</b> | 0.2201                                        | <b>0.005</b> |
| ACVR1_P983_F      | -0.2000                                     | <b>0.011</b> | 0.2119                                        | <b>0.007</b> |
| FLJ20712_P984_R   | -0.2366                                     | <b>0.002</b> | 0.2116                                        | <b>0.007</b> |
| HLA_DQA2_E93_F    | -0.2113                                     | <b>0.007</b> | 0.2081                                        | <b>0.008</b> |
| SNCG_P53_F        | -0.2082                                     | <b>0.008</b> | 0.2080                                        | <b>0.008</b> |
| CTSL_P264_R       | -0.2088                                     | <b>0.008</b> | 0.2037                                        | <b>0.009</b> |
| TRIP6_P1090_F     | -0.1891                                     | <b>0.016</b> | 0.1991                                        | <b>0.011</b> |
| CDM_seq_21_S260_R | -0.1877                                     | <b>0.017</b> | 0.1993                                        | <b>0.011</b> |
| CCKAR_P270_F      | -0.2455                                     | <b>0.002</b> | 0.1990                                        | <b>0.011</b> |
| SLC14A1_P369_R    | -0.2102                                     | <b>0.007</b> | 0.1983                                        | <b>0.011</b> |
| FRK_P258_F        | -0.1755                                     | <b>0.026</b> | 0.1978                                        | <b>0.011</b> |
| SEPT9_P374_F      | -0.1642                                     | <b>0.037</b> | 0.1947                                        | <b>0.013</b> |
| FGF1_P357_R       | -0.1749                                     | <b>0.026</b> | 0.1933                                        | <b>0.013</b> |
| TRIM29_E189_F     | -0.1671                                     | <b>0.034</b> | 0.1923                                        | <b>0.014</b> |
| CYP2E1_E53_R      | -0.2142                                     | <b>0.006</b> | 0.1902                                        | <b>0.015</b> |
| ACVR1_E328_R      | -0.1902                                     | <b>0.015</b> | 0.1901                                        | <b>0.015</b> |
| NTRK2_P10_F       | -0.2304                                     | <b>0.003</b> | 0.1898                                        | <b>0.015</b> |
| EPHA2_P203_F      | -0.1777                                     | <b>0.024</b> | 0.1898                                        | <b>0.015</b> |
| TDG_E129_F        | -0.2202                                     | <b>0.005</b> | 0.1872                                        | <b>0.017</b> |
| IL6_E168_F        | -0.1793                                     | <b>0.022</b> | 0.1869                                        | <b>0.017</b> |
| SLC5A8_P38_R      | -0.1612                                     | <b>0.041</b> | 0.1861                                        | <b>0.017</b> |
| IL12B_E25_F       | -0.2058                                     | <b>0.009</b> | 0.1825                                        | <b>0.020</b> |
| PDGFRA_E125_F     | -0.1679                                     | <b>0.033</b> | 0.1821                                        | <b>0.020</b> |
| TNK1_P221_F       | -0.1558                                     | <b>0.048</b> | 0.1810                                        | <b>0.021</b> |
| CYP2E1_P416_F     | -0.1894                                     | <b>0.016</b> | 0.1806                                        | <b>0.021</b> |
| MCAM_P265_R       | -0.1177                                     | 0.136        | 0.1796                                        | 0.022        |
| SNCG_P98_R        | -0.1832                                     | <b>0.020</b> | 0.1756                                        | <b>0.025</b> |
| VBP1_P12_R        | -0.1854                                     | <b>0.018</b> | 0.1734                                        | <b>0.027</b> |
| DSC2_P407_R       | -0.1552                                     | <b>0.049</b> | 0.1729                                        | <b>0.027</b> |
| GPC3_E72_F        | -0.2237                                     | <b>0.004</b> | 0.1723                                        | <b>0.028</b> |
| BRCA1_P835_R      | -0.1982                                     | <b>0.012</b> | 0.1688                                        | <b>0.031</b> |
| KRT5_E196_R       | -0.1761                                     | <b>0.025</b> | 0.1685                                        | <b>0.032</b> |
| VBP1_E127_F       | -0.2218                                     | <b>0.005</b> | 0.1665                                        | <b>0.034</b> |
| HDAC5_E298_F      | -0.1530                                     | 0.052        | 0.1657                                        | <b>0.035</b> |
| RARRES1_P426_R    | -0.1622                                     | <b>0.039</b> | 0.1651                                        | <b>0.035</b> |
| MAP3K8_P1036_F    | -0.1487                                     | 0.059        | 0.1649                                        | <b>0.036</b> |
| HOXC6_P456_R      | -0.1611                                     | <b>0.041</b> | 0.1642                                        | <b>0.036</b> |
| IGFBP5_P9_R       | -0.1624                                     | <b>0.039</b> | 0.1626                                        | <b>0.038</b> |
| IL16_P93_R        | -0.1542                                     | 0.050        | 0.1626                                        | <b>0.038</b> |
| CTGF_P693_R       | -0.1803                                     | <b>0.022</b> | 0.1623                                        | <b>0.039</b> |
| MYCL1_P502_R      | -0.1512                                     | 0.055        | 0.1598                                        | <b>0.042</b> |
| IGFBP7_P297_F     | -0.1347                                     | 0.088        | 0.1569                                        | <b>0.046</b> |
| MC2R_P1025_F      | -0.1487                                     | 0.059        | 0.1558                                        | <b>0.047</b> |
| SEPT9_P58_R       | -0.1314                                     | 0.096        | 0.1556                                        | <b>0.047</b> |
| ITGA6_P718_R      | -0.1632                                     | <b>0.038</b> | 0.1546                                        | <b>0.049</b> |
| LOX_P313_R        | -0.1472                                     | 0.062        | 0.1532                                        | 0.051        |
| BGN_E282_R        | -0.1684                                     | <b>0.032</b> | 0.1518                                        | 0.053        |
| PRKCDBP_P352_R    | -0.1655                                     | <b>0.035</b> | 0.1511                                        | 0.054        |
| ATP10A_P147_F     | 0.1611                                      | <b>0.041</b> | -0.1511                                       | 0.054        |
| SNURF_P78_F       | -0.1584                                     | <b>0.044</b> | 0.1510                                        | 0.054        |
| GUCY2D_P48_R      | 0.0796                                      | 0.314        | -0.1460                                       | 0.063        |
| VAMP8_P241_F      | -0.1138                                     | 0.150        | 0.1436                                        | 0.068        |
| S100A2_E36_R      | -0.1284                                     | 0.103        | 0.1399                                        | 0.075        |
| ZP3_P220_F        | -0.1042                                     | 0.187        | 0.1377                                        | 0.080        |

|                   |         |       |         |       |
|-------------------|---------|-------|---------|-------|
| BMPR1A_E88_F      | -0.0883 | 0.264 | 0.1373  | 0.081 |
| SERPINB5_P19_R    | -0.1159 | 0.142 | 0.1358  | 0.084 |
| PRSS8_E134_R      | -0.1456 | 0.065 | 0.1355  | 0.085 |
| SPI1_E205_F       | -0.1480 | 0.060 | 0.1302  | 0.098 |
| TNC_P57_F         | -0.1452 | 0.065 | 0.1273  | 0.105 |
| FGF1_E5_F         | -0.1341 | 0.089 | 0.1259  | 0.109 |
| EPHB1_E202_R      | -0.1171 | 0.138 | 0.1241  | 0.115 |
| MAPK9_P1175_F     | -0.1382 | 0.080 | 0.1235  | 0.116 |
| PIK3R1_P307_F     | -0.1073 | 0.174 | 0.1172  | 0.136 |
| MCF2_P1024_R      | -0.1491 | 0.058 | 0.1170  | 0.137 |
| NBL1_E205_R       | -0.1278 | 0.105 | 0.1156  | 0.142 |
| HSPA2_P162_R      | -0.1192 | 0.131 | 0.1127  | 0.152 |
| MECP2_P398_R      | -0.1258 | 0.111 | 0.1123  | 0.153 |
| MCF2_E195_F       | -0.1109 | 0.160 | 0.1112  | 0.158 |
| KRT5_P308_F       | -0.1224 | 0.121 | 0.1096  | 0.164 |
| PTHR1_E36_R       | -0.1178 | 0.136 | 0.1091  | 0.166 |
| RARRES1_P57_R     | -0.0690 | 0.383 | 0.1033  | 0.190 |
| HGF_P1293_R       | -0.1386 | 0.079 | 0.0998  | 0.205 |
| GLI3_E148_R       | -0.1136 | 0.150 | 0.0980  | 0.213 |
| G6PD_P597_F       | -0.1144 | 0.147 | 0.0965  | 0.220 |
| IL13_E75_R        | -0.1011 | 0.201 | 0.0936  | 0.235 |
| DNAJC15_P65_F     | -0.0754 | 0.340 | 0.0907  | 0.250 |
| LEFTY2_P719_F     | -0.0734 | 0.353 | 0.0814  | 0.302 |
| SFTPC_E13_F       | -0.0971 | 0.219 | 0.0781  | 0.322 |
| HDAC7A_P344_F     | -0.0898 | 0.256 | 0.0767  | 0.330 |
| TRIM29_P135_F     | -0.0696 | 0.379 | 0.0748  | 0.343 |
| MUSK_P308_F       | -0.0641 | 0.418 | 0.0695  | 0.378 |
| UGT1A1_E11_F      | -0.0875 | 0.268 | 0.0639  | 0.418 |
| IRF7_P277_R       | 0.0170  | 0.830 | -0.0638 | 0.418 |
| APBA1_E99_R       | 0.0441  | 0.578 | -0.0631 | 0.424 |
| Xist_seq_80_S47_R | -0.0852 | 0.281 | 0.0627  | 0.427 |
| BCL2L2_E172_F     | -0.0238 | 0.763 | 0.0575  | 0.466 |
| CSF2_P605_F       | -0.0883 | 0.264 | 0.0561  | 0.477 |
| DSG1_E292_F       | -0.0501 | 0.527 | 0.0534  | 0.499 |
| CDKN1A_P242_F     | -0.1267 | 0.108 | 0.0529  | 0.503 |
| MAGEA1_P926_F     | -0.0600 | 0.448 | 0.0484  | 0.539 |
| PTHR1_P170_R      | -0.0619 | 0.434 | 0.0441  | 0.577 |
| USP29_P282_R      | -0.0381 | 0.630 | 0.0431  | 0.585 |
| ZIM3_P451_R       | -0.0482 | 0.542 | 0.0420  | 0.594 |
| TNFRSF10D_P70_F   | 0.0256  | 0.746 | -0.0420 | 0.595 |
| PMP22_P975_F      | -0.0311 | 0.694 | 0.0380  | 0.630 |
| MMP7_P613_F       | -0.0308 | 0.698 | 0.0372  | 0.638 |
| PTPRH_P255_F      | -0.0551 | 0.486 | 0.0318  | 0.688 |
| HLA_F_E402_F      | 0.0201  | 0.800 | -0.0290 | 0.713 |
| MCC_P196_R        | -0.0589 | 0.457 | 0.0276  | 0.726 |
| COL6A1_P283_F     | -0.0460 | 0.561 | 0.0231  | 0.770 |
| FANCE_P356_R      | -0.0217 | 0.785 | -0.0214 | 0.786 |
| THBS2_E129_F      | 0.0002  | 0.998 | -0.0209 | 0.792 |

Spearman correlation coefficients and p values were used to test the relationship between increasing duration of smoking among ever smokers or years since quitting among former smokers and tumor methylation at smoking-associated CpG loci identified from GLM. Duration of smoking in years was tested across never smokers and  $\leq 10$  years, 11-20 years, and  $>20$  years smoked. Years since quitting among former smokers was tested across 0 years (current smokers),  $\leq 10$  years, 11+ years since smoking cessation.

**Table S3. Correlation of methylation and gene expression in TCGA breast tumors for CpG loci differentially methylated in current vs. never smokers**

| Cancer Panel<br>CpG probe | 450K CpG<br>probe | All tumors     |     |                 | HR+            |     |                 | HR-            |    |                 |
|---------------------------|-------------------|----------------|-----|-----------------|----------------|-----|-----------------|----------------|----|-----------------|
|                           |                   | Coefficient    | N   | p value         | Coefficient    | N   | p value         | Coefficient    | N  | p value         |
| APBA1_E99_R               | cg18505908        | -0.0478        | 581 | 2.50E-01        | -0.0589        | 391 | 2.45E-01        | -0.1167        | 97 | 2.55E-01        |
| BMP4_P199_R               | cg09229893        | <b>-0.4099</b> | 581 | <b>6.05E-25</b> | <b>-0.4423</b> | 391 | <b>3.73E-20</b> | <b>-0.3012</b> | 97 | <b>2.72E-03</b> |
| CALCA_E174_R              | cg09068492        | -0.1516        | 215 | 2.63E-02        | -0.1746        | 128 | 4.87E-02        | -0.1215        | 51 | 3.96E-01        |
| CDKN1A_P242_F             | cg23305046        | -0.1768        | 581 | 1.81E-05        | <b>-0.2106</b> | 391 | <b>2.69E-05</b> | -0.1161        | 97 | 2.58E-01        |
| DNAJC15_P65_F             | cg05035143        | <b>-0.2171</b> | 581 | <b>1.25E-07</b> | -0.1482        | 391 | 3.31E-03        | <b>-0.3079</b> | 97 | <b>2.15E-03</b> |
| DSG1_E292_F               | cg20099449        | <b>-0.3542</b> | 513 | <b>1.31E-16</b> | -0.0317        | 338 | 5.62E-01        | <b>-0.7035</b> | 91 | <b>7.48E-15</b> |
| EPHA2_P203_F              | cg15146752        | <b>-0.2204</b> | 581 | <b>8.01E-08</b> | <b>-0.2357</b> | 391 | <b>2.45E-06</b> | <b>-0.3337</b> | 97 | <b>8.36E-04</b> |
| FRK_P258_F                | cg26557270        | <b>-0.2873</b> | 581 | <b>1.68E-12</b> | <b>-0.3102</b> | 391 | <b>3.63E-10</b> | -0.1687        | 97 | 9.86E-02        |
| GPC3_E72_F                | cg27496708        | 0.0684         | 581 | 9.97E-02        | 0.0427         | 391 | 3.99E-01        | 0.0213         | 97 | 8.36E-01        |
| GRPR_P200_R               | cg26196133        | 0.0997         | 575 | 1.68E-02        | 0.1735         | 390 | 5.81E-04        | 0.1112         | 93 | 2.89E-01        |
| HGF_P1293_R               | cg14690980        | 0.1162         | 581 | 5.03E-03        | 0.1055         | 391 | 3.70E-02        | 0.0529         | 97 | 6.07E-01        |
| HOXA11_P92_R              | cg18977999        | -0.0449        | 580 | 2.81E-01        | -0.0462        | 391 | 3.63E-01        | -0.0591        | 96 | 5.67E-01        |
| HOXC6_P456_R              | cg02491017        | <b>-0.2757</b> | 581 | <b>1.35E-11</b> | <b>-0.3683</b> | 391 | <b>5.28E-14</b> | -0.0872        | 97 | 3.96E-01        |
| IGF2AS_P203_F             | cg14188639        | -0.1353        | 484 | 2.85E-03        | -0.1644        | 332 | 2.66E-03        | -0.1636        | 69 | 1.79E-01        |
| IGFBP5_P9_R               | cg20419545        | -0.1779        | 581 | 1.61E-05        | -0.1766        | 391 | 4.50E-04        | -0.0663        | 97 | 5.19E-01        |
| IL12B_E25_F               | cg18307303        | <b>0.2860</b>  | 516 | <b>3.58E-11</b> | <b>0.2756</b>  | 343 | <b>2.14E-07</b> | <b>0.2805</b>  | 89 | <b>7.76E-03</b> |
| KRT5_E196_R               | cg04254916        | -0.0992        | 576 | 1.73E-02        | 0.0082         | 388 | 8.73E-01        | <b>-0.5324</b> | 97 | <b>2.00E-08</b> |
| LOX_P313_R                | cg08623535        | -0.1129        | 581 | 6.42E-03        | -0.1447        | 391 | 4.13E-03        | -0.1170        | 97 | 2.54E-01        |
| MMP7_P613_F               | cg20645973        | <b>-0.2107</b> | 580 | <b>3.03E-07</b> | 0.0244         | 390 | 6.31E-01        | <b>-0.4697</b> | 97 | <b>1.21E-06</b> |
| MYCL1_P502_R              | cg27650434        | -0.1720        | 581 | 3.09E-05        | -0.1131        | 391 | 2.54E-02        | <b>-0.2277</b> | 97 | <b>2.49E-02</b> |
| NBL1_E205_R               | cg21813747        | -0.0789        | 581 | 5.73E-02        | -0.0638        | 391 | 2.08E-01        | 0.0155         | 97 | 8.80E-01        |
| POMC_P53_F                | cg00293936        | -0.1870        | 578 | 6.04E-06        | -0.1257        | 388 | 1.32E-02        | <b>-0.2278</b> | 97 | <b>2.48E-02</b> |
| PRSS8_E134_R              | cg27436259        | <b>-0.2833</b> | 581 | <b>3.45E-12</b> | <b>-0.2691</b> | 391 | <b>6.48E-08</b> | <b>-0.3046</b> | 97 | <b>2.42E-03</b> |
| RIPK3_P124_F              | cg13583230        | <b>-0.7121</b> | 581 | <b>5.39E-91</b> | <b>-0.7180</b> | 391 | <b>3.46E-63</b> | <b>-0.6097</b> | 97 | <b>3.40E-11</b> |
| SERPINE1_P519_F           | cg19722814        | -0.1047        | 581 | 1.16E-02        | -0.0762        | 391 | 1.32E-01        | -0.1310        | 97 | 2.01E-01        |
| SFTPC_E13_F               | cg11540705        | 0.1300         | 103 | 1.91E-01        | 0.2483         | 53  | 7.31E-02        | 0.0450         | 35 | 7.97E-01        |
| SLC5A8_P38_R              | cg13433302        | <b>-0.2212</b> | 406 | <b>6.83E-06</b> | <b>-0.2612</b> | 270 | <b>1.38E-05</b> | 0.0307         | 76 | 7.92E-01        |
| SNCG_P98_R                | cg03677069        | -0.1766        | 581 | 1.87E-05        | <b>-0.2211</b> | 391 | <b>1.02E-05</b> | 0.0248         | 97 | 8.10E-01        |
| SPI1_E205_F               | cg07675031        | <b>-0.4957</b> | 581 | <b>2.35E-37</b> | <b>-0.4881</b> | 391 | <b>8.49E-25</b> | <b>-0.5888</b> | 97 | <b>2.26E-10</b> |
| TAL1_E122_F               | cg00875272        | -0.1995        | 581 | 1.26E-06        | -0.1784        | 391 | 3.94E-04        | 0.1227         | 97 | 2.31E-01        |
| TAL1_P817_F               | cg26891410        | -0.0682        | 581 | 1.01E-01        | -0.1102        | 391 | 2.94E-02        | 0.1838         | 97 | 7.15E-02        |
| TNFRSF10D_P70_F           | cg04134048        | <b>-0.5006</b> | 581 | <b>3.49E-38</b> | <b>-0.4131</b> | 391 | <b>1.52E-17</b> | <b>-0.5511</b> | 97 | <b>4.95E-09</b> |
| TRIM29_P135_F             | cg24593464        | <b>-0.2593</b> | 581 | <b>2.23E-10</b> | -0.0882        | 391 | 8.17E-02        | <b>-0.5300</b> | 97 | <b>2.37E-08</b> |
| UGT1A1_E11_F              | cg03607648        | 0.1866         | 68  | 1.28E-01        | 0.0668         | 42  | 6.74E-01        | <b>0.3121</b>  | 15 | <b>2.57E-01</b> |
| USP29_P282_R              | cg16675193        | -0.1135        | 22  | 6.15E-01        | 0.1781         | 14  | 5.43E-01        | <b>-0.6075</b> | 5  | <b>2.77E-01</b> |
| VAMP8_P241_F              | cg05486094        | -0.1873        | 581 | 5.50E-06        | -0.1707        | 391 | 7.02E-04        | <b>-0.2752</b> | 97 | <b>6.36E-03</b> |
| VBP1_P12_R                | cg16091746        | <b>-0.2854</b> | 581 | <b>2.39E-12</b> | <b>-0.2608</b> | 391 | <b>1.69E-07</b> | <b>-0.3059</b> | 97 | <b>2.31E-03</b> |
| Xist_seq_80_S47_R         | cg11717280        | <b>-0.5489</b> | 580 | <b>6.03E-47</b> | <b>-0.5577</b> | 390 | <b>2.91E-33</b> | <b>-0.6358</b> | 97 | <b>2.62E-12</b> |
| ZP3_P220_F                | cg14667235        | <b>-0.3102</b> | 581 | <b>2.02E-14</b> | <b>-0.2970</b> | 391 | <b>2.10E-09</b> | <b>-0.2230</b> | 97 | <b>2.81E-02</b> |

CpGs are restricted to those that exactly match between the Illumina Cancer Panel I array used in this study and the Illumina 450K methylation platform used in TCGA. Pearson correlation coefficients were calculated in 581 TCGA breast tumors to test the relationship between methylation and RNAseq expression.

**Table S4. CpG loci differentially methylated at p<0.05 in current vs. never smokers, by race and HR status**

**Black cases**

**HR+** (n=40 CpGs; 40 hyper)

**HR-** (n=67 CpGs; 52 hypo, 15 hyper)

| Probe             | Coefficient Current vs. Never | Current Mean Beta | Never Mean Beta | p value  | FDR adjusted p value | Probe           | Coefficient Current vs. Never | Current Mean Beta | Never Mean Beta | p value  | FDR adjusted p value |
|-------------------|-------------------------------|-------------------|-----------------|----------|----------------------|-----------------|-------------------------------|-------------------|-----------------|----------|----------------------|
| RIPK4_P172_F      | 1.0233                        | 0.1733            | 0.1111          | 1.55E-05 | <b>1.45E-02</b>      | BMPR1A_E88_F    | -0.6321                       | 0.6046            | 0.7331          | 1.33E-04 | 1.24E-01             |
| SMO_E57_F         | 1.2224                        | 0.1006            | 0.0739          | 4.17E-05 | <b>1.95E-02</b>      | MAP3K8_P1036_F  | -0.7746                       | 0.4220            | 0.6405          | 4.72E-04 | 2.20E-01             |
| MAF_P826_R        | 0.9624                        | 0.1293            | 0.0940          | 1.19E-04 | <b>3.70E-02</b>      | TNF_P158_F      | 1.0571                        | 0.1968            | 0.1086          | 7.94E-04 | 2.47E-01             |
| MYCL1_P502_R      | 0.6765                        | 0.1580            | 0.0904          | 7.27E-04 | 1.60E-01             | RASGRF1_P768_F  | 0.6871                        | 0.1149            | 0.0891          | 2.52E-03 | 4.73E-01             |
| FN1_E469_F        | 0.8020                        | 0.1643            | 0.1081          | 8.84E-04 | 1.60E-01             | LEFTY2_P719_F   | -0.7097                       | 0.8870            | 0.9023          | 2.53E-03 | 4.73E-01             |
| POMC_P53_F        | 0.7541                        | 0.1079            | 0.0803          | 1.13E-03 | 1.60E-01             | IGF1_E394_F     | -0.4934                       | 0.5468            | 0.6563          | 3.74E-03 | 5.37E-01             |
| HLF_E192_F        | 0.8922                        | 0.1496            | 0.0901          | 1.20E-03 | 1.60E-01             | TNFRSF10A_P91_F | 0.6200                        | 0.2364            | 0.1534          | 5.41E-03 | 5.37E-01             |
| ITGA2_P26_R       | 0.4556                        | 0.0949            | 0.0700          | 1.54E-03 | 1.80E-01             | DMP1_E194_F     | -0.4308                       | 0.8829            | 0.9059          | 5.80E-03 | 5.37E-01             |
| TNC_P198_F        | 0.6849                        | 0.3158            | 0.2272          | 2.48E-03 | 2.57E-01             | FGF1_P357_R     | -0.5877                       | 0.5581            | 0.6967          | 7.01E-03 | 5.37E-01             |
| MYLK_E132_R       | 0.4817                        | 0.2255            | 0.1889          | 2.98E-03 | 2.60E-01             | MC2R_P1025_F    | -0.7254                       | 0.3556            | 0.5094          | 8.02E-03 | 5.37E-01             |
| ER_seq_a1_S60_F   | 0.5030                        | 0.1891            | 0.1545          | 3.07E-03 | 2.60E-01             | PIK3R1_P307_F   | -0.3442                       | 0.8878            | 0.9099          | 8.97E-03 | 5.37E-01             |
| NTSR1_E109_F      | 0.7769                        | 0.1192            | 0.0879          | 5.52E-03 | 4.29E-01             | POMC_P53_F      | 0.4499                        | 0.1093            | 0.0842          | 9.02E-03 | 5.37E-01             |
| IGF2AS_P203_F     | 0.8061                        | 0.7253            | 0.5771          | 7.71E-03 | 5.54E-01             | ITGA6_P718_R    | -0.4768                       | 0.8856            | 0.9239          | 9.10E-03 | 5.37E-01             |
| Xist_seq_80_S95_R | 0.4508                        | 0.8035            | 0.7447          | 1.02E-02 | 6.78E-01             | EPHA1_P119_R    | 0.6752                        | 0.1310            | 0.1063          | 9.11E-03 | 5.37E-01             |
| CDM_seq_21_S260_R | 0.4475                        | 0.4417            | 0.3408          | 1.37E-02 | 8.52E-01             | HDAC7A_P344_F   | -0.8071                       | 0.8472            | 0.9168          | 9.13E-03 | 5.37E-01             |
| DLL1_P386_F       | 0.6471                        | 0.0845            | 0.0632          | 1.56E-02 | 9.07E-01             | DSC2_P407_R     | -0.4419                       | 0.8032            | 0.8515          | 9.50E-03 | 5.37E-01             |
| ODC1_P424_F       | 0.5836                        | 0.0803            | 0.0681          | 1.88E-02 | 9.92E-01             | CSF1_P339_F     | -3.0064                       | 0.0936            | 0.1336          | 1.01E-02 | 5.37E-01             |
| RET_seq_53_S374_F | 0.6445                        | 0.1182            | 0.0954          | 2.03E-02 | 9.92E-01             | RBP1_P150_F     | -1.7366                       | 0.0708            | 0.0943          | 1.04E-02 | 5.37E-01             |
| PTPRO_E56_F       | 0.6928                        | 0.1205            | 0.0935          | 2.15E-02 | 9.92E-01             | TSP50_E21_R     | -0.5170                       | 0.7890            | 0.8435          | 1.09E-02 | 5.37E-01             |
| MYH11_P236_R      | 0.6674                        | 0.2590            | 0.1584          | 2.38E-02 | 9.92E-01             | TRIM29_E189_F   | -0.4302                       | 0.6567            | 0.7629          | 1.16E-02 | 5.43E-01             |
| DSP_P440_R        | 0.4560                        | 0.1046            | 0.0898          | 2.48E-02 | 9.92E-01             | RARA_E128_R     | -0.6477                       | 0.1304            | 0.2512          | 1.34E-02 | 5.67E-01             |
| CCNA1_E7_F        | 0.7450                        | 0.4691            | 0.3446          | 2.58E-02 | 9.92E-01             | S100A2_P1186_F  | -0.5465                       | 0.5530            | 0.6661          | 1.41E-02 | 5.67E-01             |
| CASP2_P192_F      | 0.6008                        | 0.0886            | 0.0869          | 2.60E-02 | 9.92E-01             | DDR1_P332_R     | -0.5677                       | 0.3191            | 0.4672          | 1.43E-02 | 5.67E-01             |
| MMP9_P237_R       | 0.4731                        | 0.2188            | 0.1804          | 2.68E-02 | 9.92E-01             | ZP3_P220_F      | -0.4898                       | 0.7010            | 0.7672          | 1.46E-02 | 5.67E-01             |
| PMP22_P975_F      | 0.5174                        | 0.8192            | 0.7602          | 2.93E-02 | 9.92E-01             | SPI1_E205_F     | -0.3666                       | 0.5343            | 0.6090          | 1.59E-02 | 5.81E-01             |
| TPEF_seq_44_S88_R | 0.6158                        | 0.5207            | 0.4219          | 3.10E-02 | 9.92E-01             | FASTK_P598_R    | -0.3818                       | 0.6121            | 0.7028          | 1.73E-02 | 5.81E-01             |
| EVI2A_P94_R       | 0.5858                        | 0.8330            | 0.7915          | 3.17E-02 | 9.92E-01             | OGG1_E400_F     | -0.5321                       | 0.3077            | 0.4461          | 1.87E-02 | 5.81E-01             |
| PCDH1_P264_F      | 0.4697                        | 0.2499            | 0.1699          | 3.24E-02 | 9.92E-01             | FGF1_E5_F       | -0.4465                       | 0.7328            | 0.8092          | 2.07E-02 | 5.81E-01             |
| WNT10B_P993_F     | 0.4384                        | 0.2845            | 0.2152          | 3.28E-02 | 9.92E-01             | DNMT3B_P352_R   | -0.4352                       | 0.1578            | 0.2198          | 2.11E-02 | 5.81E-01             |
| DST_P262_R        | 0.3244                        | 0.1105            | 0.1018          | 3.44E-02 | 9.92E-01             | TDG_E129_F      | -0.3904                       | 0.7523            | 0.8032          | 2.15E-02 | 5.81E-01             |
| PTHR1_P170_R      | 0.7419                        | 0.9063            | 0.8488          | 3.58E-02 | 9.92E-01             | LOX_P313_R      | -0.5750                       | 0.1947            | 0.2935          | 2.21E-02 | 5.81E-01             |
| TFAP2C_P765_F     | 0.7041                        | 0.2014            | 0.1747          | 3.64E-02 | 9.92E-01             | SLC5A8_P38_R    | -0.5007                       | 0.1451            | 0.2214          | 2.31E-02 | 5.81E-01             |
| CYP1B1_E83_R      | 0.5170                        | 0.2964            | 0.2341          | 3.68E-02 | 9.92E-01             | EPHA2_P203_F    | -0.5000                       | 0.4310            | 0.5725          | 2.32E-02 | 5.81E-01             |
| OSM_P34_F         | 0.4233                        | 0.6574            | 0.6106          | 3.95E-02 | 9.92E-01             | FRK_P258_F      | -0.5717                       | 0.4995            | 0.6184          | 2.34E-02 | 5.81E-01             |
| GSTM1_P266_F      | 0.4103                        | 0.5947            | 0.5405          | 3.98E-02 | 9.92E-01             | HS3ST2_E145_R   | 0.7848                        | 0.6934            | 0.5369          | 2.36E-02 | 5.81E-01             |
| ALPL_P278_F       | 0.6248                        | 0.1180            | 0.0890          | 4.04E-02 | 9.92E-01             | TMPRSS4_E83_F   | -0.5454                       | 0.8228            | 0.8992          | 2.36E-02 | 5.81E-01             |
| OPCML_E219_R      | 0.6084                        | 0.3395            | 0.2667          | 4.10E-02 | 9.92E-01             | HHIP_P578_R     | -0.4281                       | 0.4311            | 0.4851          | 2.37E-02 | 5.81E-01             |
| SMARCA3_P109_R    | 0.3140                        | 0.1082            | 0.0902          | 4.13E-02 | 9.92E-01             | TYRO3_P366_F    | -0.4837                       | 0.1739            | 0.2523          | 2.37E-02 | 5.81E-01             |
| TAL1_E122_F       | 0.5220                        | 0.3039            | 0.2462          | 4.26E-02 | 9.92E-01             | MAPK9_P1175_F   | -0.4679                       | 0.8756            | 0.9146          | 2.60E-02 | 5.81E-01             |
| FN1_P229_R        | 0.4222                        | 0.1721            | 0.1251          | 4.82E-02 | 9.92E-01             | TNFRSF10D_E27_F | 0.8554                        | 0.5489            | 0.3652          | 2.66E-02 | 5.81E-01             |
|                   |                               |                   |                 |          |                      | SNCG_P53_F      | -0.5126                       | 0.5326            | 0.6558          | 2.75E-02 | 5.81E-01             |
|                   |                               |                   |                 |          |                      | COL6A1_P283_F   | 0.9089                        | 0.0819            | 0.0398          | 2.81E-02 | 5.81E-01             |
|                   |                               |                   |                 |          |                      | NPR2_P618_F     | -0.6009                       | 0.2791            | 0.3657          | 2.85E-02 | 5.81E-01             |
|                   |                               |                   |                 |          |                      | IGSF4C_P533_R   | 0.4758                        | 0.1285            | 0.1138          | 2.92E-02 | 5.81E-01             |
|                   |                               |                   |                 |          |                      | EPHA1_E46_R     | 0.4703                        | 0.1420            | 0.1014          | 2.98E-02 | 5.81E-01             |
|                   |                               |                   |                 |          |                      | TNFRSF10D_P70_F | 0.6809                        | 0.5580            | 0.4029          | 3.02E-02 | 5.81E-01             |
|                   |                               |                   |                 |          |                      | HBII-52_P563_F  | -0.3213                       | 0.8336            | 0.8465          | 3.10E-02 | 5.81E-01             |
|                   |                               |                   |                 |          |                      | EPHA2_P340_R    | -0.3914                       | 0.3395            | 0.4393          | 3.12E-02 | 5.81E-01             |
|                   |                               |                   |                 |          |                      | IL12B_P392_R    | -0.4368                       | 0.4844            | 0.6302          | 3.14E-02 | 5.81E-01             |
|                   |                               |                   |                 |          |                      | LY6G6E_P45_R    | -0.5272                       | 0.8111            | 0.8833          | 3.15E-02 | 5.81E-01             |
|                   |                               |                   |                 |          |                      | CD82_P557_R     | -0.5025                       | 0.2084            | 0.2965          | 3.22E-02 | 5.81E-01             |



|  |  |  |  |  |  |                   |         |        |        |          |          |
|--|--|--|--|--|--|-------------------|---------|--------|--------|----------|----------|
|  |  |  |  |  |  | CDM_seq_21_S260_R | -0.3723 | 0.2807 | 0.3808 | 3.24E-02 | 5.81E-01 |
|  |  |  |  |  |  | CTSL_P264_R       | -0.4191 | 0.3609 | 0.4678 | 3.52E-02 | 6.11E-01 |
|  |  |  |  |  |  | IL13_E75_R        | -0.3706 | 0.9019 | 0.9292 | 3.54E-02 | 6.11E-01 |
|  |  |  |  |  |  | MLH3_P25_F        | 0.3760  | 0.1298 | 0.1270 | 4.15E-02 | 6.13E-01 |
|  |  |  |  |  |  | PDGFB_P719_F      | -0.3518 | 0.6507 | 0.7379 | 4.16E-02 | 6.13E-01 |
|  |  |  |  |  |  | FGF6_P139_R       | -0.3494 | 0.8724 | 0.8810 | 4.22E-02 | 6.13E-01 |
|  |  |  |  |  |  | GSTM2_P109_R      | 0.7004  | 0.5996 | 0.4203 | 4.24E-02 | 6.13E-01 |
|  |  |  |  |  |  | ITK_P114_F        | 0.3887  | 0.8355 | 0.7663 | 4.39E-02 | 6.13E-01 |
|  |  |  |  |  |  | DSP_P36_F         | -0.4002 | 0.1704 | 0.2463 | 4.45E-02 | 6.13E-01 |
|  |  |  |  |  |  | SFRP1_P157_F      | 0.7504  | 0.1617 | 0.1326 | 4.53E-02 | 6.13E-01 |
|  |  |  |  |  |  | SNCG_P98_R        | -0.4305 | 0.5465 | 0.6560 | 4.54E-02 | 6.13E-01 |
|  |  |  |  |  |  | HIF1A_P488_F      | -0.3277 | 0.1292 | 0.1642 | 4.55E-02 | 6.13E-01 |
|  |  |  |  |  |  | SEPT9_P374_F      | -0.5568 | 0.3614 | 0.4411 | 4.58E-02 | 6.13E-01 |
|  |  |  |  |  |  | GPX1_P194_F       | -0.9304 | 0.2321 | 0.3691 | 4.61E-02 | 6.13E-01 |
|  |  |  |  |  |  | TEK_P526_F        | -0.3391 | 0.7507 | 0.7745 | 4.66E-02 | 6.13E-01 |
|  |  |  |  |  |  | SNURF_P78_F       | -0.3657 | 0.7526 | 0.7887 | 4.72E-02 | 6.13E-01 |

### White cases

**HR+** (n=19 CpGs; 5 hypo, 14 hyper)

**HR-** (n=114 CpGs; 95 hypo, 19 hyper)

| Probe           | Coefficient Current vs. Never | Current Mean Beta | Never Mean Beta | p value  | FDR adjusted p value | Probe               | Coefficient Current vs. never | Current Mean Beta | Never Mean Beta | p value  | FDR adjusted p value |
|-----------------|-------------------------------|-------------------|-----------------|----------|----------------------|---------------------|-------------------------------|-------------------|-----------------|----------|----------------------|
| FRZB_E186_R     | 0.6328                        | 0.4437            | 0.3245          | 2.27E-03 | 9.97E-01             | DKFZP56400823_E45_F | 1.2523                        | 0.1326            | 0.0855          | 1.72E-04 | 1.30E-01             |
| BMP4_P199_R     | 0.5962                        | 0.7163            | 0.5833          | 2.88E-03 | 9.97E-01             | HGF_P1293_R         | -0.8890                       | 0.8844            | 0.9286          | 2.99E-04 | 1.30E-01             |
| MYCL1_P502_R    | 0.4056                        | 0.1363            | 0.1118          | 4.41E-03 | 9.97E-01             | TIAM1_P188_R        | 0.8186                        | 0.1124            | 0.0766          | 5.37E-04 | 1.30E-01             |
| KIAA1804_P689_R | -0.4949                       | 0.1020            | 0.1521          | 8.92E-03 | 9.97E-01             | MKRN3_P108_F        | -0.9164                       | 0.8067            | 0.8684          | 5.57E-04 | 1.30E-01             |
| CTSL_P264_R     | -0.3935                       | 0.3438            | 0.4226          | 1.44E-02 | 9.97E-01             | MCF2_E195_F         | -0.8312                       | 0.7544            | 0.8445          | 7.46E-04 | 1.37E-01             |
| TMEM63A_E63_F   | 0.3495                        | 0.0968            | 0.0744          | 1.49E-02 | 9.97E-01             | p16_seq_47_S188_R   | 0.8493                        | 0.0969            | 0.0726          | 9.30E-04 | 1.37E-01             |
| LAMB1_E144_R    | -0.2676                       | 0.1526            | 0.1995          | 1.60E-02 | 9.97E-01             | SOD3_P225_F         | -0.6423                       | 0.8945            | 0.9242          | 1.03E-03 | 1.37E-01             |
| MST1R_P392_F    | -0.4253                       | 0.1368            | 0.1673          | 2.55E-02 | 9.97E-01             | ZIM3_P451_R         | -1.0043                       | 0.8933            | 0.9348          | 1.32E-03 | 1.48E-01             |
| PLXDC2_E337_F   | 0.3671                        | 0.0906            | 0.0753          | 2.59E-02 | 9.97E-01             | MCC_P196_R          | -1.5974                       | 0.0458            | 0.0476          | 1.43E-03 | 1.48E-01             |
| OPCML_P71_F     | 0.2931                        | 0.3346            | 0.3042          | 3.07E-02 | 9.97E-01             | IL12B_E25_F         | -0.6717                       | 0.8150            | 0.8784          | 1.72E-03 | 1.61E-01             |
| HOXA11_P92_R    | 0.3777                        | 0.2276            | 0.1739          | 3.20E-02 | 9.97E-01             | CSF2_P605_F         | -0.6072                       | 0.8469            | 0.8900          | 2.07E-03 | 1.76E-01             |
| S100A4_E315_F   | -0.3719                       | 0.2881            | 0.3521          | 3.29E-02 | 9.97E-01             | WRN_P969_F          | -0.7955                       | 0.8517            | 0.8934          | 2.73E-03 | 1.92E-01             |
| ESR2_E66_F      | 0.5253                        | 0.2316            | 0.1764          | 3.67E-02 | 9.97E-01             | ACVR1_P983_F        | -0.6915                       | 0.7820            | 0.8490          | 2.76E-03 | 1.92E-01             |
| KDR_E79_F       | 0.4450                        | 0.1609            | 0.1149          | 3.77E-02 | 9.97E-01             | CDKN1A_P242_F       | 2.5126                        | 0.1232            | 0.0638          | 3.00E-03 | 1.92E-01             |
| COL1A1_P117_R   | 0.3184                        | 0.5654            | 0.4898          | 3.85E-02 | 9.97E-01             | Xist_seq_80_S47_R   | -0.5249                       | 0.7326            | 0.8006          | 3.19E-03 | 1.92E-01             |
| BMP4_P123_R     | 0.3927                        | 0.4154            | 0.3238          | 4.03E-02 | 9.97E-01             | PTHR1_E36_R         | -0.6837                       | 0.8714            | 0.9095          | 3.29E-03 | 1.92E-01             |
| ASCL1_E24_F     | 0.4929                        | 0.1374            | 0.0973          | 4.04E-02 | 9.97E-01             | CD9_P585_R          | -0.7817                       | 0.5085            | 0.6403          | 4.15E-03 | 2.18E-01             |
| CDH11_P203_R    | 0.4671                        | 0.1202            | 0.1005          | 4.22E-02 | 9.97E-01             | VAMP8_P241_F        | -0.5719                       | 0.4911            | 0.6022          | 4.46E-03 | 2.18E-01             |
| CCND2_P898_R    | 0.4135                        | 0.3092            | 0.2615          | 4.62E-02 | 9.97E-01             | MECP2_P398_R        | -0.6246                       | 0.5374            | 0.6391          | 4.53E-03 | 2.18E-01             |
|                 |                               |                   |                 |          |                      | DSC2_P407_R         | -0.6764                       | 0.8093            | 0.8621          | 4.79E-03 | 2.18E-01             |
|                 |                               |                   |                 |          |                      | PIK3R1_P307_F       | -0.5384                       | 0.8735            | 0.9069          | 4.91E-03 | 2.18E-01             |
|                 |                               |                   |                 |          |                      | MKRN3_E144_F        | -0.8455                       | 0.8196            | 0.8785          | 5.15E-03 | 2.18E-01             |
|                 |                               |                   |                 |          |                      | MAP3K9_E17_R        | 0.8248                        | 0.1849            | 0.1518          | 5.65E-03 | 2.29E-01             |
|                 |                               |                   |                 |          |                      | APBA1_E99_R         | 0.7410                        | 0.1884            | 0.1046          | 6.18E-03 | 2.40E-01             |
|                 |                               |                   |                 |          |                      | SERPINB2_P939_F     | -0.5712                       | 0.9106            | 0.9339          | 7.36E-03 | 2.61E-01             |
|                 |                               |                   |                 |          |                      | BCL2L2_E172_F       | 0.4963                        | 0.1117            | 0.0881          | 7.59E-03 | 2.61E-01             |
|                 |                               |                   |                 |          |                      | TRIM29_P135_F       | -0.6032                       | 0.6929            | 0.7625          | 7.66E-03 | 2.61E-01             |
|                 |                               |                   |                 |          |                      | IL16_P93_R          | -0.6762                       | 0.4553            | 0.6119          | 7.82E-03 | 2.61E-01             |
|                 |                               |                   |                 |          |                      | CSF1_P339_F         | -2.2168                       | 0.0867            | 0.0705          | 9.09E-03 | 2.84E-01             |
|                 |                               |                   |                 |          |                      | G6PD_P597_F         | -0.6210                       | 0.6564            | 0.7403          | 9.15E-03 | 2.84E-01             |
|                 |                               |                   |                 |          |                      | SLC14A1_P369_R      | -0.5970                       | 0.6670            | 0.7545          | 9.62E-03 | 2.90E-01             |
|                 |                               |                   |                 |          |                      | MMP7_P613_F         | -0.4756                       | 0.8146            | 0.8591          | 1.06E-02 | 3.05E-01             |
|                 |                               |                   |                 |          |                      | MAP3K1_E81_F        | 0.5773                        | 0.2473            | 0.1773          | 1.08E-02 | 3.05E-01             |
|                 |                               |                   |                 |          |                      | MYCL1_P502_R        | -0.6298                       | 0.0790            | 0.1086          | 1.12E-02 | 3.05E-01             |
|                 |                               |                   |                 |          |                      | USP29_P282_R        | -0.5115                       | 0.8762            | 0.9060          | 1.14E-02 | 3.05E-01             |
|                 |                               |                   |                 |          |                      | RUNX3_E27_R         | -0.6135                       | 0.6106            | 0.7062          | 1.20E-02 | 3.07E-01             |

|  |  |  |  |  |  |                   |         |        |        |          |          |
|--|--|--|--|--|--|-------------------|---------|--------|--------|----------|----------|
|  |  |  |  |  |  | MST1R_E42_R       | -0.7065 | 0.4570 | 0.5757 | 1.24E-02 | 3.07E-01 |
|  |  |  |  |  |  | TAL1_P817_F       | -0.5570 | 0.7534 | 0.8071 | 1.25E-02 | 3.07E-01 |
|  |  |  |  |  |  | PTPRG_E40_R       | 0.5163  | 0.1605 | 0.1130 | 1.30E-02 | 3.12E-01 |
|  |  |  |  |  |  | CDM_seq_21_S260_R | -0.5777 | 0.3045 | 0.4042 | 1.49E-02 | 3.24E-01 |
|  |  |  |  |  |  | ACVR1_E328_R      | -0.6722 | 0.6473 | 0.7514 | 1.50E-02 | 3.24E-01 |
|  |  |  |  |  |  | RUNX3_P247_F      | -0.6162 | 0.6764 | 0.7641 | 1.55E-02 | 3.24E-01 |
|  |  |  |  |  |  | IGF2AS_E4_F       | 0.5061  | 0.3638 | 0.2858 | 1.56E-02 | 3.24E-01 |
|  |  |  |  |  |  | PDGFRA_E125_F     | -0.7038 | 0.4298 | 0.5332 | 1.56E-02 | 3.24E-01 |
|  |  |  |  |  |  | DDR2_P743_R       | -0.5003 | 0.8501 | 0.8958 | 1.66E-02 | 3.24E-01 |
|  |  |  |  |  |  | NPR2_P1093_F      | -0.6505 | 0.8034 | 0.8531 | 1.69E-02 | 3.24E-01 |
|  |  |  |  |  |  | MUSK_P308_F       | -0.4950 | 0.7816 | 0.8263 | 1.72E-02 | 3.24E-01 |
|  |  |  |  |  |  | DES_P1006_R       | -0.5146 | 0.7083 | 0.7817 | 1.74E-02 | 3.24E-01 |
|  |  |  |  |  |  | PRDM2_P1340_R     | -0.4941 | 0.8675 | 0.9051 | 1.77E-02 | 3.24E-01 |
|  |  |  |  |  |  | TRIP6_P1090_F     | -0.5777 | 0.5632 | 0.6274 | 1.84E-02 | 3.24E-01 |
|  |  |  |  |  |  | TRIM29_E189_F     | -0.6686 | 0.6678 | 0.7505 | 1.84E-02 | 3.24E-01 |
|  |  |  |  |  |  | EPHB3_E0_F        | -0.7281 | 0.0739 | 0.1067 | 1.87E-02 | 3.24E-01 |
|  |  |  |  |  |  | DKC1_E101_F       | -0.4913 | 0.3446 | 0.4426 | 1.90E-02 | 3.24E-01 |
|  |  |  |  |  |  | IGFBP1_P12_R      | -0.6195 | 0.4649 | 0.5521 | 1.91E-02 | 3.24E-01 |
|  |  |  |  |  |  | MAPK9_P1175_F     | -0.4957 | 0.8948 | 0.9184 | 1.94E-02 | 3.24E-01 |
|  |  |  |  |  |  | MMP9_P237_R       | -0.6698 | 0.1321 | 0.1923 | 1.95E-02 | 3.24E-01 |
|  |  |  |  |  |  | IL13_E75_R        | -0.5303 | 0.9118 | 0.9330 | 2.00E-02 | 3.24E-01 |
|  |  |  |  |  |  | HS3ST2_E145_R     | -0.8637 | 0.4129 | 0.6224 | 2.05E-02 | 3.24E-01 |
|  |  |  |  |  |  | MKRN4_P1320_R     | -0.4046 | 0.8933 | 0.9200 | 2.06E-02 | 3.24E-01 |
|  |  |  |  |  |  | KRT5_E196_R       | -0.5999 | 0.8442 | 0.8855 | 2.08E-02 | 3.24E-01 |
|  |  |  |  |  |  | SNURF_P78_F       | -0.6010 | 0.6720 | 0.7754 | 2.20E-02 | 3.33E-01 |
|  |  |  |  |  |  | MMP7_E59_F        | -0.5760 | 0.3120 | 0.3515 | 2.25E-02 | 3.33E-01 |
|  |  |  |  |  |  | GSTM2_P453_R      | -0.5119 | 0.6950 | 0.7705 | 2.29E-02 | 3.33E-01 |
|  |  |  |  |  |  | SERPINB5_P19_R    | -0.6402 | 0.7177 | 0.7855 | 2.33E-02 | 3.33E-01 |
|  |  |  |  |  |  | EGFR_E295_R       | 0.4338  | 0.1098 | 0.0738 | 2.34E-02 | 3.33E-01 |
|  |  |  |  |  |  | SHB_P691_R        | 0.3860  | 0.1342 | 0.0990 | 2.36E-02 | 3.33E-01 |
|  |  |  |  |  |  | KLK11_P1290_F     | -0.4310 | 0.8277 | 0.8700 | 2.39E-02 | 3.33E-01 |
|  |  |  |  |  |  | MCF2_P1024_R      | -0.5745 | 0.7839 | 0.8432 | 2.53E-02 | 3.43E-01 |
|  |  |  |  |  |  | OSM_P188_F        | -0.5531 | 0.6022 | 0.6360 | 2.53E-02 | 3.43E-01 |
|  |  |  |  |  |  | VBP1_P12_R        | -0.5092 | 0.4175 | 0.5126 | 2.64E-02 | 3.51E-01 |
|  |  |  |  |  |  | NFKB1_P496_F      | -0.5421 | 0.2458 | 0.3052 | 2.71E-02 | 3.56E-01 |
|  |  |  |  |  |  | UGT1A1_E11_F      | -0.6256 | 0.9375 | 0.9594 | 2.76E-02 | 3.57E-01 |
|  |  |  |  |  |  | PMP22_P975_F      | -0.5707 | 0.7537 | 0.8276 | 2.84E-02 | 3.62E-01 |
|  |  |  |  |  |  | IGFBP1_E48_R      | -0.4704 | 0.5899 | 0.6747 | 2.95E-02 | 3.62E-01 |
|  |  |  |  |  |  | HOXC6_P456_R      | -0.5777 | 0.1435 | 0.1866 | 2.96E-02 | 3.62E-01 |
|  |  |  |  |  |  | EMR3_P39_R        | -0.4964 | 0.5322 | 0.6019 | 3.04E-02 | 3.62E-01 |
|  |  |  |  |  |  | IRF7_P277_R       | 0.8602  | 0.2247 | 0.1668 | 3.08E-02 | 3.62E-01 |
|  |  |  |  |  |  | GRPR_P200_R       | -0.4869 | 0.6662 | 0.7355 | 3.11E-02 | 3.62E-01 |
|  |  |  |  |  |  | PRKCDBP_P352_R    | -0.6685 | 0.1491 | 0.2399 | 3.13E-02 | 3.62E-01 |
|  |  |  |  |  |  | BGN_E282_R        | -0.4902 | 0.6120 | 0.7159 | 3.18E-02 | 3.62E-01 |
|  |  |  |  |  |  | DNMT2_P199_F      | -0.4254 | 0.7981 | 0.8414 | 3.18E-02 | 3.62E-01 |
|  |  |  |  |  |  | MAGEA1_P926_F     | -0.7030 | 0.8422 | 0.8891 | 3.24E-02 | 3.62E-01 |
|  |  |  |  |  |  | GADD45A_P737_R    | -0.5102 | 0.2980 | 0.3597 | 3.28E-02 | 3.62E-01 |
|  |  |  |  |  |  | CYP2E1_E53_R      | -0.5996 | 0.6528 | 0.7420 | 3.30E-02 | 3.62E-01 |
|  |  |  |  |  |  | DDR2_E331_F       | -0.6620 | 0.8329 | 0.8733 | 3.34E-02 | 3.62E-01 |
|  |  |  |  |  |  | DSG1_E292_F       | -0.4238 | 0.8544 | 0.8782 | 3.36E-02 | 3.62E-01 |
|  |  |  |  |  |  | CYP2E1_P416_F     | -0.6609 | 0.7242 | 0.7946 | 3.40E-02 | 3.62E-01 |
|  |  |  |  |  |  | THY1_P20_R        | 0.4188  | 0.3685 | 0.3278 | 3.41E-02 | 3.62E-01 |
|  |  |  |  |  |  | PITX2_P183_R      | -0.4364 | 0.3397 | 0.4259 | 3.49E-02 | 3.66E-01 |
|  |  |  |  |  |  | PTCH2_P568_R      | -0.4220 | 0.2931 | 0.3177 | 3.66E-02 | 3.77E-01 |
|  |  |  |  |  |  | APC_P14_F         | -1.0435 | 0.3421 | 0.3974 | 3.79E-02 | 3.77E-01 |
|  |  |  |  |  |  | FGF1_P357_R       | -0.5109 | 0.5998 | 0.6819 | 3.84E-02 | 3.77E-01 |
|  |  |  |  |  |  | S100A2_E36_R      | -0.5518 | 0.4690 | 0.5800 | 3.87E-02 | 3.77E-01 |
|  |  |  |  |  |  | CTGF_P693_R       | -0.6339 | 0.6779 | 0.7718 | 3.93E-02 | 3.77E-01 |
|  |  |  |  |  |  | GLA_P112_F        | -0.5005 | 0.7479 | 0.7976 | 3.93E-02 | 3.77E-01 |
|  |  |  |  |  |  | CHI3L2_E10_F      | -0.4443 | 0.6711 | 0.7021 | 3.99E-02 | 3.77E-01 |

|  |  |  |  |  |  |                |         |        |        |          |          |
|--|--|--|--|--|--|----------------|---------|--------|--------|----------|----------|
|  |  |  |  |  |  | FGF2_P229_F    | -0.5816 | 0.3968 | 0.4626 | 4.06E-02 | 3.77E-01 |
|  |  |  |  |  |  | PLAT_P80_F     | -0.4957 | 0.2613 | 0.3678 | 4.07E-02 | 3.77E-01 |
|  |  |  |  |  |  | MEST_P62_R     | 0.6449  | 0.5935 | 0.5221 | 4.10E-02 | 3.77E-01 |
|  |  |  |  |  |  | MC2R_E455_F    | -0.6017 | 0.8471 | 0.8878 | 4.16E-02 | 3.77E-01 |
|  |  |  |  |  |  | ARHGAP9_P518_R | -0.4657 | 0.8168 | 0.8583 | 4.16E-02 | 3.77E-01 |
|  |  |  |  |  |  | MEST_E150_F    | 0.6549  | 0.5279 | 0.4584 | 4.16E-02 | 3.77E-01 |
|  |  |  |  |  |  | ZIM3_E203_F    | -0.3820 | 0.9208 | 0.9343 | 4.21E-02 | 3.77E-01 |
|  |  |  |  |  |  | SNURF_E256_R   | -0.4359 | 0.7424 | 0.8221 | 4.25E-02 | 3.77E-01 |
|  |  |  |  |  |  | THY1_P149_R    | 0.5964  | 0.5217 | 0.4264 | 4.28E-02 | 3.77E-01 |
|  |  |  |  |  |  | KRT5_P308_F    | -0.4597 | 0.6991 | 0.7490 | 4.29E-02 | 3.77E-01 |
|  |  |  |  |  |  | GRB10_P260_F   | 0.3674  | 0.1002 | 0.0829 | 4.45E-02 | 3.85E-01 |
|  |  |  |  |  |  | RARRES1_P57_R  | -0.2905 | 0.6705 | 0.7154 | 4.46E-02 | 3.85E-01 |
|  |  |  |  |  |  | HSPA2_P162_R   | -0.4906 | 0.8532 | 0.8904 | 4.50E-02 | 3.85E-01 |
|  |  |  |  |  |  | TNC_P198_F     | -0.5736 | 0.2000 | 0.2340 | 4.70E-02 | 3.99E-01 |
|  |  |  |  |  |  | FRK_P258_F     | -0.5725 | 0.5458 | 0.6474 | 4.82E-02 | 4.04E-01 |
|  |  |  |  |  |  | PTHLH_P757_F   | -0.3188 | 0.8258 | 0.8508 | 4.87E-02 | 4.04E-01 |
|  |  |  |  |  |  | PRSS8_E134_R   | -0.5228 | 0.7382 | 0.8008 | 4.89E-02 | 4.04E-01 |
|  |  |  |  |  |  | RBP1_P150_F    | 0.6612  | 0.1149 | 0.0695 | 4.99E-02 | 4.09E-01 |

**Table S5. Top differentially methylated CpG loci in current versus never smokers, stratified by HR status and race**

| Black cases                                                  |            |     |          |          |                 | White cases         |            |     |          |          |          |
|--------------------------------------------------------------|------------|-----|----------|----------|-----------------|---------------------|------------|-----|----------|----------|----------|
| CpG Probe                                                    | CpG ID     | Chr | Coef     | p value  | q value         | CpG probe           | CpG ID     | Chr | Coef     | p value  | q value  |
| <b>HR+ tumors</b>                                            |            |     |          |          |                 |                     |            |     |          |          |          |
| <b>Top 10 differentially methylated</b>                      |            |     |          |          |                 |                     |            |     |          |          |          |
| RIPK4_P172_F                                                 | cg19812226 | 21  | 1.02331  | 1.55E-05 | <b>1.45E-02</b> | FRZB_E186_R         | cg01872931 | 2   | 0.63276  | 2.27E-03 | 9.97E-01 |
| SMO_E57_F                                                    | cg13659980 | 7   | 1.22238  | 4.17E-05 | <b>1.95E-02</b> | BMP4_P199_R         | cg09229893 | 14  | 0.59623  | 2.88E-03 | 9.97E-01 |
| MAF_P826_R                                                   | cg24274831 | 16  | 0.96239  | 1.19E-04 | <b>3.70E-02</b> | MYCL1_P502_R        | cg27650434 | 1   | 0.40556  | 4.41E-03 | 9.97E-01 |
| MYCL1_P502_R                                                 | cg27650434 | 1   | 0.67652  | 7.27E-04 | 1.60E-01        | KIAA1804_P689_R     | cg09524235 | 1   | -0.49491 | 8.92E-03 | 9.97E-01 |
| FN1_E469_F                                                   | cg01966735 | 2   | 0.80196  | 8.84E-04 | 1.60E-01        | CTSL_P264_R         | cg20035138 | 9   | -0.39349 | 1.44E-02 | 9.97E-01 |
| POMC_P53_F                                                   | cg00293936 | 2   | 0.75408  | 1.13E-03 | 1.60E-01        | TMEM63A_E63_F       | cg09739214 | 1   | 0.34952  | 1.49E-02 | 9.97E-01 |
| HLF_E192_F                                                   | cg05876326 | 17  | 0.89222  | 1.20E-03 | 1.60E-01        | LAMB1_E144_R        | cg24971900 | 7   | -0.26764 | 1.60E-02 | 9.97E-01 |
| ITGA2_P26_R                                                  | cg15676241 | 5   | 0.45560  | 1.54E-03 | 1.80E-01        | MST1R_P392_F        | cg03610760 | 3   | -0.42527 | 2.55E-02 | 9.97E-01 |
| TNC_P198_F                                                   | cg22480835 | 9   | 0.68490  | 2.48E-03 | 2.57E-01        | PLXDC2_E337_F       | cg16953926 | 10  | 0.36708  | 2.59E-02 | 9.97E-01 |
| MYLK_E132_R                                                  | cg07455270 | 3   | 0.48175  | 2.98E-03 | 2.60E-01        | OPCML_P71_F         | cg00738841 | 11  | 0.29313  | 3.07E-02 | 9.97E-01 |
| <b>Differentially methylated in both blacks &amp; whites</b> |            |     |          |          |                 |                     |            |     |          |          |          |
| MYCL1_P502_R                                                 | cg27650434 | 1   | 0.595    | 5.02E-04 | 2.34E-01        | MYCL1_P502_R        | cg27650434 | 1   | 0.354    | 1.54E-02 | 9.96E-01 |
| <b>HR- tumors</b>                                            |            |     |          |          |                 |                     |            |     |          |          |          |
| <b>Top 10 differentially methylated</b>                      |            |     |          |          |                 |                     |            |     |          |          |          |
| BMPR1A_E88_F                                                 | cg14602437 | 10  | -0.63213 | 1.33E-04 | 1.24E-01        | DKFZP564O0823_E45_F | cg14481786 | 4   | 1.25227  | 1.72E-04 | 1.30E-01 |
| MAP3K8_P1036_F                                               | cg21555918 | 10  | -0.77462 | 4.72E-04 | 2.20E-01        | HGF_P1293_R         | cg14690980 | 7   | -0.88901 | 2.99E-04 | 1.30E-01 |
| TNF_P158_F                                                   | cg26444570 | 6   | 1.05709  | 7.94E-04 | 2.47E-01        | TIAM1_P188_R        | cg02217293 | 21  | 0.81863  | 5.37E-04 | 1.30E-01 |
| RASGRF1_P768_F                                               | cg08522779 | 15  | 0.68707  | 2.52E-03 | 4.73E-01        | MKRN3_P108_F        | cg19407225 | 15  | -0.91639 | 5.57E-04 | 1.30E-01 |
| LEFTY2_P719_F                                                | cg09540507 | 1   | -0.70971 | 2.53E-03 | 4.73E-01        | MCF2_E195_F         | cg20900840 | X   | -0.83117 | 7.46E-04 | 1.37E-01 |
| IGF1_E394_F                                                  | cg17084217 | 12  | -0.49338 | 3.74E-03 | 5.37E-01        | p16_seq_47_S188_R   | cg05238395 | 9   | 0.84930  | 9.30E-04 | 1.37E-01 |
| TNFRSF10A_P91_F                                              | cg25641272 | 8   | 0.61997  | 5.41E-03 | 5.37E-01        | SOD3_P225_F         | cg10307548 | 4   | -0.64232 | 1.03E-03 | 1.37E-01 |
| DMP1_E194_F                                                  | cg18397653 | 4   | -0.43081 | 5.80E-03 | 5.37E-01        | ZIM3_P451_R         | cg16859188 | 19  | -1.00432 | 1.32E-03 | 1.48E-01 |
| FGF1_P357_R                                                  | cg05353098 | 5   | -0.58768 | 7.01E-03 | 5.37E-01        | MCC_P196_R          | cg19728002 | 5   | -1.59739 | 1.43E-03 | 1.48E-01 |
| MC2R_P1025_F                                                 | cg00358505 | 18  | -0.72542 | 8.02E-03 | 5.37E-01        | IL12B_E25_F         | cg18307303 | 5   | -0.67171 | 1.72E-03 | 1.61E-01 |
| <b>Differentially methylated in both blacks &amp; whites</b> |            |     |          |          |                 |                     |            |     |          |          |          |
| CDM_seq_21_S260_R                                            | cg18682265 | X   | -0.37231 | 3.24E-02 | 5.81E-01        | CDM_seq_21_S260_R   | cg18682265 | X   | -0.57768 | 1.49E-02 | 3.24E-01 |
| CSF1_P339_F                                                  | cg06450700 | 1   | -3.00642 | 1.01E-02 | 5.37E-01        | CSF1_P339_F         | cg06450700 | 1   | -2.21680 | 9.09E-03 | 2.84E-01 |
| DSC2_P407_R                                                  | cg20887958 | 18  | -0.44191 | 9.50E-03 | 5.37E-01        | DSC2_P407_R         | cg20887958 | 18  | -0.67638 | 4.79E-03 | 2.18E-01 |
| FGF1_P357_R                                                  | cg05353098 | 5   | -0.58768 | 7.01E-03 | 5.37E-01        | FGF1_P357_R         | cg05353098 | 5   | -0.51093 | 3.84E-02 | 3.77E-01 |
| FRK_P258_F                                                   | cg26557270 | 6   | -0.57172 | 2.34E-02 | 5.81E-01        | FRK_P258_F          | cg26557270 | 6   | -0.57252 | 4.82E-02 | 4.04E-01 |
| IL13_E75_R                                                   | cg20391122 | 5   | -0.37063 | 3.54E-02 | 6.11E-01        | IL13_E75_R          | cg20391122 | 5   | -0.53027 | 2.00E-02 | 3.24E-01 |
| MAPK9_P1175_F                                                | cg05023457 | 5   | -0.46791 | 2.60E-02 | 5.81E-01        | MAPK9_P1175_F       | cg05023457 | 5   | -0.49570 | 1.94E-02 | 3.24E-01 |
| PIK3R1_P307_F                                                | cg03473299 | 5   | -0.34424 | 8.97E-03 | 5.37E-01        | PIK3R1_P307_F       | cg03473299 | 5   | -0.53838 | 4.91E-03 | 2.18E-01 |
| SNURF_P78_F                                                  | cg15999943 | 15  | -0.36565 | 4.72E-02 | 6.13E-01        | SNURF_P78_F         | cg15999943 | 15  | -0.60101 | 2.20E-02 | 3.33E-01 |
| TRIM29_E189_F                                                | cg26414304 | 11  | -0.43017 | 1.16E-02 | 5.43E-01        | TRIM29_E189_F       | cg26414304 | 11  | -0.66864 | 1.84E-02 | 3.24E-01 |

Models were adjusted for age (continuous), race (AA vs. non-AA), menopausal status (premenopausal vs. postmenopausal), BMI (<25, 25-29, >29 kg/m<sup>2</sup>), alcohol consumption (lifetime consumption in grams/week), and stage (1, 2, 3, 4). Coef; coefficient. Positive coefficients indicate higher methylation in smokers, while negative coefficients indicate lower methylation in smokers. Chr; chromosome.

**Table S6. Results of DAVID 6.8 gene ontology analyses**

| Category                                                     | Term                                                             | Count | Fold Enrichment | P Value  | Benjamini |
|--------------------------------------------------------------|------------------------------------------------------------------|-------|-----------------|----------|-----------|
| <b>Current vs never smoking in HR- tumors (top 50 shown)</b> |                                                                  |       |                 |          |           |
| GOTERM_BP_ALL                                                | response to stress                                               | 45    | 1.70            | 5.21E-05 | 8.37E-02  |
| GOTERM_BP_ALL                                                | response to ethanol                                              | 7     | 9.63            | 8.43E-05 | 9.00E-02  |
| GOTERM_BP_ALL                                                | protein metabolic process                                        | 48    | 1.68            | 2.94E-05 | 9.40E-02  |
| GOTERM_BP_ALL                                                | peptidyl-amino acid modification                                 | 22    | 2.38            | 2.14E-04 | 9.76E-02  |
| GOTERM_BP_ALL                                                | cellular protein metabolic process                               | 44    | 1.65            | 1.55E-04 | 9.89E-02  |
| GOTERM_BP_ALL                                                | rhythmic process                                                 | 10    | 4.85            | 2.01E-04 | 1.06E-01  |
| GOTERM_BP_ALL                                                | cellular component organization                                  | 51    | 1.50            | 3.20E-04 | 1.12E-01  |
| GOTERM_BP_ALL                                                | single-organism process                                          | 84    | 1.16            | 4.30E-04 | 1.13E-01  |
| GOTERM_BP_ALL                                                | response to organic substance                                    | 41    | 1.71            | 1.48E-04 | 1.17E-01  |
| GOTERM_BP_ALL                                                | multi-organism process                                           | 26    | 2.03            | 4.92E-04 | 1.19E-01  |
| GOTERM_BP_ALL                                                | response to alcohol                                              | 8     | 6.14            | 3.08E-04 | 1.21E-01  |
| GOTERM_BP_ALL                                                | antigen processing and presentation of exogenous peptide antigen | 3     | 93.14           | 4.23E-04 | 1.21E-01  |
| GOTERM_BP_ALL                                                | negative regulation of cellular process                          | 49    | 1.48            | 6.20E-04 | 1.30E-01  |
| GOTERM_BP_ALL                                                | cellular component organization or biogenesis                    | 51    | 1.48            | 4.20E-04 | 1.31E-01  |
| GOTERM_BP_ALL                                                | response to chemical                                             | 46    | 1.53            | 6.19E-04 | 1.38E-01  |
| GOTERM_BP_ALL                                                | response to hormone                                              | 16    | 2.65            | 7.90E-04 | 1.53E-01  |
| GOTERM_BP_ALL                                                | cell death                                                       | 33    | 1.71            | 1.14E-03 | 1.66E-01  |
| GOTERM_BP_ALL                                                | cellular response to chemical stimulus                           | 38    | 1.60            | 1.21E-03 | 1.69E-01  |
| GOTERM_BP_ALL                                                | response to steroid hormone                                      | 10    | 3.92            | 9.44E-04 | 1.70E-01  |
| GOTERM_BP_ALL                                                | single-organism cellular process                                 | 79    | 1.19            | 1.01E-03 | 1.71E-01  |
| GOTERM_BP_ALL                                                | response to organic cyclic compound                              | 16    | 2.56            | 1.13E-03 | 1.73E-01  |
| GOTERM_BP_ALL                                                | cellular protein modification process                            | 38    | 1.60            | 1.31E-03 | 1.73E-01  |
| GOTERM_BP_ALL                                                | protein modification process                                     | 38    | 1.60            | 1.31E-03 | 1.73E-01  |
| GOTERM_BP_ALL                                                | antigen processing and presentation of exogenous antigen         | 3     | 59.27           | 1.10E-03 | 1.76E-01  |
| GOTERM_BP_ALL                                                | response to extracellular stimulus                               | 11    | 3.38            | 1.40E-03 | 1.77E-01  |
| GOTERM_BP_ALL                                                | negative regulation of biological process                        | 50    | 1.42            | 1.45E-03 | 1.77E-01  |
| GOTERM_BP_ALL                                                | apoptotic process                                                | 29    | 1.77            | 1.70E-03 | 1.97E-01  |
| GOTERM_BP_ALL                                                | regulation of primary metabolic process                          | 50    | 1.41            | 1.85E-03 | 2.06E-01  |
| GOTERM_BP_ALL                                                | response to nutrient levels                                      | 10    | 3.44            | 2.31E-03 | 2.09E-01  |
| GOTERM_BP_ALL                                                | regulation of signaling                                          | 42    | 1.49            | 2.30E-03 | 2.15E-01  |
| GOTERM_BP_ALL                                                | response to stimulus                                             | 69    | 1.24            | 2.50E-03 | 2.19E-01  |
| GOTERM_BP_ALL                                                | programmed cell death                                            | 31    | 1.69            | 2.29E-03 | 2.20E-01  |
| GOTERM_BP_ALL                                                | macromolecule modification                                       | 38    | 1.56            | 2.14E-03 | 2.20E-01  |
| GOTERM_BP_ALL                                                | regulation of cell communication                                 | 42    | 1.49            | 2.22E-03 | 2.20E-01  |
| GOTERM_BP_ALL                                                | positive regulation of cell activation                           | 12    | 2.96            | 2.14E-03 | 2.26E-01  |
| GOTERM_BP_ALL                                                | regulation of metabolic process                                  | 52    | 1.37            | 2.78E-03 | 2.34E-01  |
| GOTERM_BP_ALL                                                | response to oxygen-containing compound                           | 24    | 1.85            | 3.17E-03 | 2.56E-01  |
| GOTERM_BP_ALL                                                | single-organism metabolic process                                | 34    | 1.59            | 3.35E-03 | 2.57E-01  |
| GOTERM_BP_ALL                                                | peptidyl-tyrosine modification                                   | 15    | 2.39            | 3.28E-03 | 2.57E-01  |
| GOTERM_BP_ALL                                                | peptidyl-tyrosine phosphorylation                                | 15    | 2.39            | 3.28E-03 | 2.57E-01  |
| GOTERM_BP_ALL                                                | cellular response to stimulus                                    | 63    | 1.27            | 3.60E-03 | 2.61E-01  |
| GOTERM_BP_ALL                                                | single-organism localization                                     | 30    | 1.66            | 3.56E-03 | 2.64E-01  |
| GOTERM_BP_ALL                                                | response to external stimulus                                    | 32    | 1.61            | 3.98E-03 | 2.79E-01  |
| GOTERM_BP_ALL                                                | cellular response to organic substance                           | 33    | 1.58            | 4.27E-03 | 2.84E-01  |
| GOTERM_BP_ALL                                                | response to endogenous stimulus                                  | 26    | 1.75            | 4.19E-03 | 2.85E-01  |
| GOTERM_BP_ALL                                                | regulation of cellular metabolic process                         | 49    | 1.36            | 4.90E-03 | 3.01E-01  |
| GOTERM_BP_ALL                                                | phosphorus metabolic process                                     | 36    | 1.52            | 4.89E-03 | 3.06E-01  |
| GOTERM_BP_ALL                                                | phosphate-containing compound metabolic process                  | 36    | 1.52            | 4.89E-03 | 3.06E-01  |
| GOTERM_BP_ALL                                                | regulation of response to stimulus                               | 44    | 1.41            | 4.88E-03 | 3.11E-01  |
| GOTERM_BP_ALL                                                | cellular process                                                 | 88    | 1.07            | 5.57E-03 | 3.29E-01  |
| <b>Current vs never smoking in HR+ tumors</b>                |                                                                  |       |                 |          |           |
| GOTERM_BP_ALL                                                | biosynthetic process                                             | 14    | 2.30            | 2.20E-04 | 5.80E-02  |
| GOTERM_BP_ALL                                                | regulation of RNA biosynthetic process                           | 12    | 2.90            | 2.00E-04 | 6.00E-02  |
| GOTERM_BP_ALL                                                | regulation of RNA metabolic process                              | 12    | 2.80            | 2.60E-04 | 6.00E-02  |
| GOTERM_BP_ALL                                                | regulation of cellular macromolecule biosynthetic process        | 12    | 2.70            | 3.90E-04 | 6.00E-02  |
| GOTERM_BP_ALL                                                | RNA biosynthetic process                                         | 12    | 2.70            | 3.70E-04 | 6.20E-02  |
| GOTERM_BP_ALL                                                | nucleic acid-templated transcription                             | 12    | 2.80            | 3.50E-04 | 6.40E-02  |
| GOTERM_BP_ALL                                                | macromolecule biosynthetic process                               | 13    | 2.50            | 3.40E-04 | 6.90E-02  |
| GOTERM_BP_ALL                                                | organic substance biosynthetic process                           | 14    | 2.40            | 1.90E-04 | 7.00E-02  |
| GOTERM_BP_ALL                                                | regulation of nucleic acid-templated transcription               | 12    | 3.00            | 1.80E-04 | 8.30E-02  |
| GOTERM_BP_ALL                                                | aromatic compound biosynthetic process                           | 12    | 2.50            | 9.10E-04 | 9.00E-02  |
| GOTERM_BP_ALL                                                | regulation of nitrogen compound metabolic process                | 12    | 2.50            | 1.00E-03 | 9.10E-02  |
| GOTERM_BP_ALL                                                | heterocycle biosynthetic process                                 | 12    | 2.50            | 8.30E-04 | 9.30E-02  |
| GOTERM_BP_ALL                                                | cellular biosynthetic process                                    | 13    | 2.30            | 8.80E-04 | 9.30E-02  |
| GOTERM_BP_ALL                                                | transcription, DNA-templated                                     | 11    | 2.70            | 1.00E-03 | 9.50E-02  |
| GOTERM_BP_ALL                                                | organic cyclic compound biosynthetic process                     | 12    | 2.40            | 1.10E-03 | 9.50E-02  |
| GOTERM_BP_ALL                                                | nucleobase-containing compound biosynthetic process              | 12    | 2.50            | 8.30E-04 | 9.90E-02  |
| GOTERM_BP_ALL                                                | regulation of cellular biosynthetic process                      | 12    | 2.60            | 7.30E-04 | 1.00E-01  |
| GOTERM_BP_ALL                                                | regulation of nucleobase-containing compound metabolic process   | 12    | 2.50            | 7.90E-04 | 1.00E-01  |
| GOTERM_BP_ALL                                                | regulation of transcription, DNA-templated                       | 12    | 3.00            | 1.80E-04 | 1.10E-01  |
| GOTERM_BP_ALL                                                | cellular nitrogen compound biosynthetic process                  | 12    | 2.40            | 1.30E-03 | 1.10E-01  |
| GOTERM_BP_ALL                                                | cellular macromolecule biosynthetic process                      | 12    | 2.40            | 1.40E-03 | 1.10E-01  |

|               |                                                                               |    |       |          |          |
|---------------|-------------------------------------------------------------------------------|----|-------|----------|----------|
| GOTERM_BP_ALL | regulation of gene expression                                                 | 12 | 2.40  | 1.50E-03 | 1.10E-01 |
| GOTERM_BP_ALL | positive regulation of cellular biosynthetic process                          | 9  | 3.30  | 1.50E-03 | 1.10E-01 |
| GOTERM_BP_ALL | regulation of transcription involved in G1/S transition of mitotic cell cycle | 2  | 1137  | 1.70E-03 | 1.10E-01 |
| GOTERM_BP_ALL | multicellular organismal process                                              | 16 | 1.60  | 1.70E-03 | 1.10E-01 |
| GOTERM_BP_ALL | positive regulation of biosynthetic process                                   | 9  | 3.20  | 2.10E-03 | 1.30E-01 |
| GOTERM_BP_ALL | regulation of macromolecule biosynthetic process                              | 13 | 2.80  | 8.70E-05 | 1.50E-01 |
| GOTERM_BP_ALL | regulation of biosynthetic process                                            | 13 | 2.70  | 1.70E-04 | 1.50E-01 |
| GOTERM_BP_ALL | RNA metabolic process                                                         | 12 | 2.20  | 3.20E-03 | 1.80E-01 |
| GOTERM_BP_ALL | leukocyte migration                                                           | 5  | 6.90  | 4.00E-03 | 2.20E-01 |
| GOTERM_BP_ALL | regulation of immune system process                                           | 8  | 3.30  | 4.50E-03 | 2.40E-01 |
| GOTERM_BP_ALL | regulation of macromolecule metabolic process                                 | 13 | 1.90  | 6.40E-03 | 3.10E-01 |
| GOTERM_BP_ALL | positive regulation of macromolecule biosynthetic process                     | 8  | 3.10  | 6.50E-03 | 3.10E-01 |
| GOTERM_BP_ALL | positive regulation of nucleobase-containing compound metabolic process       | 8  | 3.00  | 7.10E-03 | 3.20E-01 |
| GOTERM_BP_ALL | monocyte chemotaxis                                                           | 3  | 21.9  | 7.20E-03 | 3.20E-01 |
| GOTERM_BP_ALL | single-organism biosynthetic process                                          | 6  | 4.30  | 7.40E-03 | 3.20E-01 |
| GOTERM_BP_ALL | nucleic acid metabolic process                                                | 12 | 1.90  | 9.40E-03 | 3.40E-01 |
| GOTERM_BP_ALL | single-organism cellular process                                              | 17 | 1.30  | 9.50E-03 | 3.40E-01 |
| GOTERM_BP_ALL | positive regulation of nitrogen compound metabolic process                    | 8  | 2.90  | 8.50E-03 | 3.50E-01 |
| GOTERM_BP_ALL | nitrogen compound metabolic process                                           | 13 | 1.80  | 9.20E-03 | 3.50E-01 |
| GOTERM_BP_ALL | regulation of multicellular organismal process                                | 11 | 2.10  | 9.30E-03 | 3.50E-01 |
| GOTERM_BP_ALL | negative regulation of cell-substrate adhesion                                | 3  | 19.30 | 9.20E-03 | 3.60E-01 |
| GOTERM_BP_ALL | regulation of metabolic process                                               | 13 | 1.80  | 9.10E-03 | 3.70E-01 |
| GOTERM_BP_ALL | gene expression                                                               | 12 | 1.90  | 1.10E-02 | 3.70E-01 |
| GOTERM_BP_ALL | negative regulation of cell adhesion                                          | 4  | 7.80  | 1.10E-02 | 3.80E-01 |
| GOTERM_BP_ALL | mitotic cell cycle                                                            | 5  | 5.00  | 1.20E-02 | 3.80E-01 |
| GOTERM_BP_ALL | regulation of cellular component organization                                 | 9  | 2.40  | 1.20E-02 | 3.90E-01 |
| GOTERM_BP_ALL | positive regulation of nucleic acid-templated transcription                   | 7  | 3.20  | 1.20E-02 | 3.90E-01 |
| GOTERM_BP_ALL | positive regulation of transcription, DNA-templated                           | 7  | 3.20  | 1.20E-02 | 3.90E-01 |
| GOTERM_BP_ALL | positive regulation of RNA biosynthetic process                               | 7  | 3.10  | 1.30E-02 | 3.90E-01 |

**Figure S1. Volcano plots illustrating array-wide patterns of breast tumor differential methylation in smokers compared with never smokers.** Generalized linear regression (GLM) (logit link) was used to compare breast tumor methylation beta values between ever or current smokers and never smokers, adjusting for age, race, menopausal status, BMI, and alcohol consumption. Volcano plots display patterns of breast tumor differential methylation in each smoking group (ever or current) versus never smokers among (A) all cases, (B) HR+ cases, and (C) HR- cases. Each volcano plot displays the negative log of unadjusted p-values for differences in  $\beta$  (proportion DNA methylated) at each probe on the y axis versus the correlation coefficient for methylation at each CpG locus on the x axis. Probes that fall above the broken line are significant at  $p < 0.05$ . Probes hypomethylated in smokers have negative coefficients) and probes hypermethylated in smokers have positive coefficients).

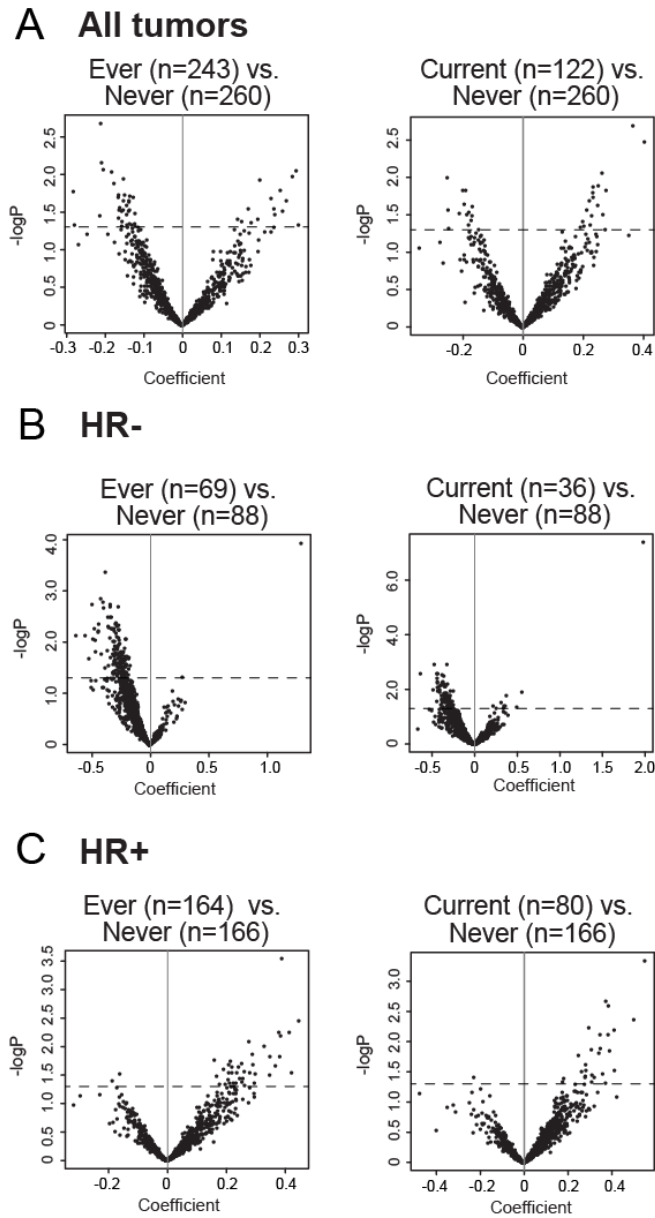

**Figure S2. Volcano plots illustrating array-wide patterns of breast tumor differential methylation in former smokers compared with never smokers.** Generalized linear regression (GLM) (logit link) was used to compare breast tumor methylation beta values between former and never smokers, adjusting for age, race, menopausal status, BMI, and alcohol consumption (left side). Models on the right side were additionally adjusted for clinical stage (1-4). Volcano plots display patterns of breast tumor differential methylation in former smokers versus never smokers among (A) all cases, (B) HR- cases, and (C) HR+ cases. Each volcano plot displays the negative log of unadjusted p-values for differences in  $\beta$  (proportion DNA methylated) at each probe on the y axis versus the correlation coefficient for methylation at each CpG locus on the x axis. Probes that fall above the broken line are significant at  $p < 0.05$ . Probes hypomethylated in smokers have negative coefficients) and probes hypermethylated in smokers have positive coefficients.

### A All tumors

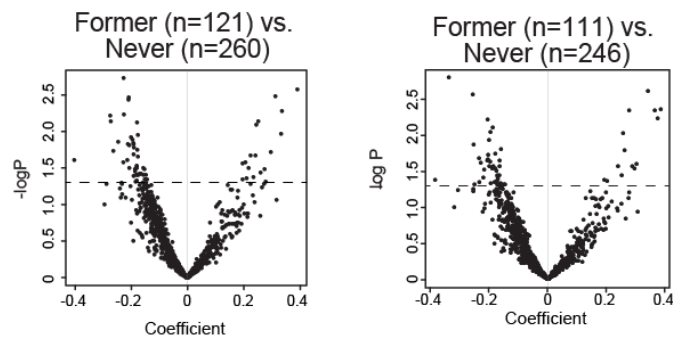

### B HR-

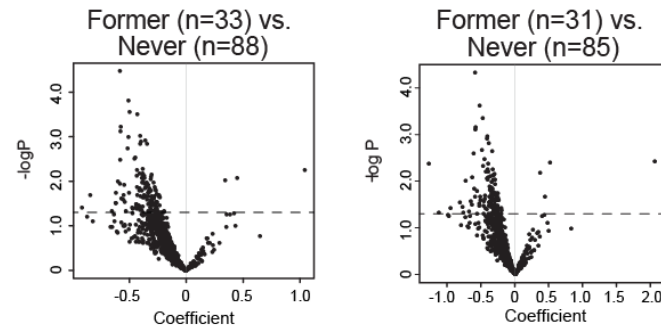

### C HR+

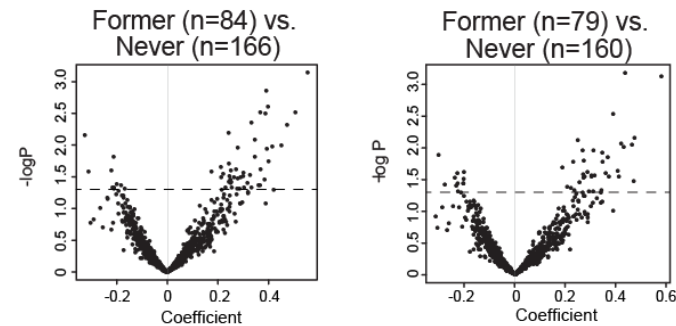

Not adjusted for stage

Adjusted for stage



**Figure S3a. Patterns of methylation at CpGs differentially methylated at  $p < 0.05$  in HR-breast tumors from current versus never smokers.** Methylation differences according to (A) smoking status in current (C) ( $n=37$ ) or former (F) ( $n=34$ ) smokers compared with never smokers (N) ( $n=92$ ), (B) increasing duration of smoking in years among ever smokers: N ( $n=92$ ),  $\leq 10$  ( $n=25$ ), 11-20 ( $n=16$ ), or  $>20$  years ( $n=29$ ), and (C) years since quitting among former smokers: C ( $n=37$ ),  $\leq 10$  ( $n=18$ ), 11+ ( $n=16$ ), N ( $n=92$ ).

**A Smoking Status**

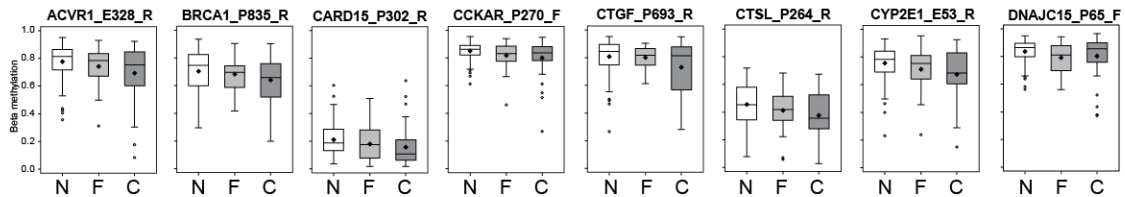

**B Years Smoked (ever smokers)**

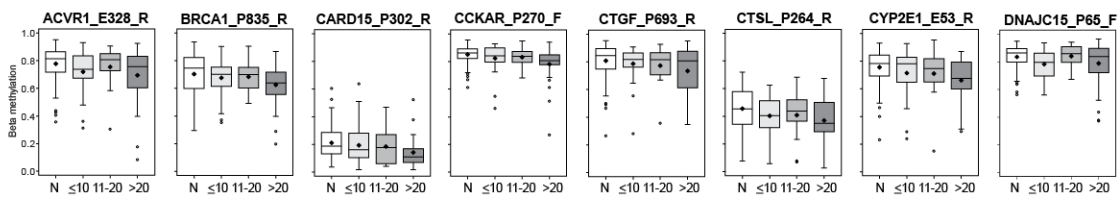

**C Years Since Quitting (former smokers)**

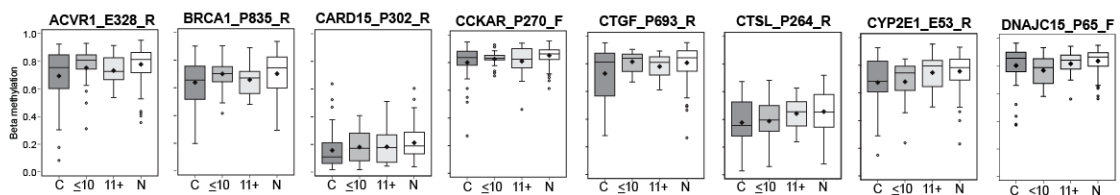

**A Smoking Status**

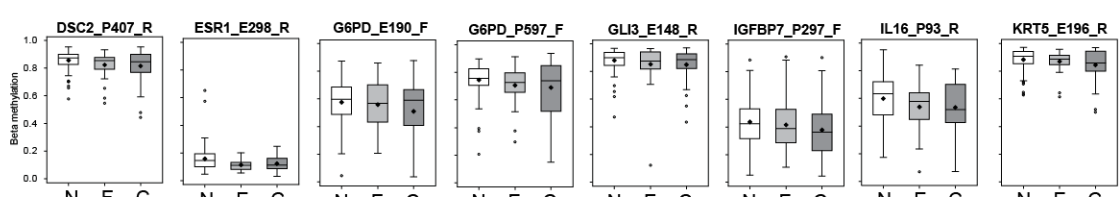

**B Years Smoked (ever smokers)**

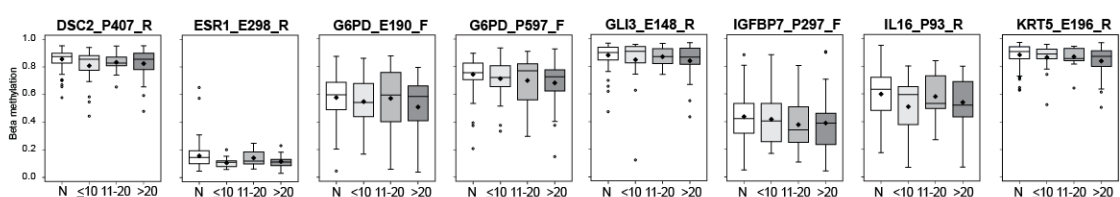

**C Years Since Quitting (former smokers)**

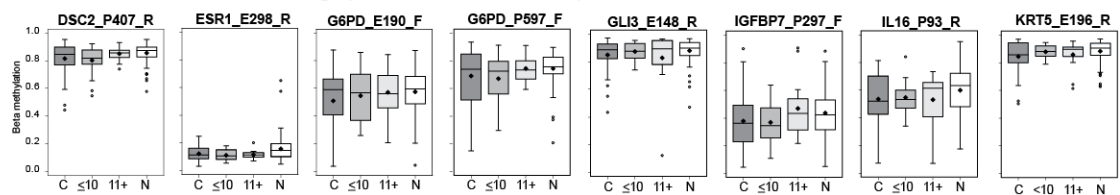

**Figure S3b. Patterns of methylation at CpGs differentially methylated at  $p < 0.05$  in HR-breast tumors from current versus never smokers.** Methylation differences according to (A) smoking status in current (C) ( $n=37$ ) or former (F) ( $n=34$ ) smokers compared with never smokers (N) ( $n=92$ ), (B) increasing duration of smoking in years among ever smokers: N ( $n=92$ ),  $\leq 10$  ( $n=25$ ), 11-20 ( $n=16$ ), or  $>20$  years ( $n=29$ ), and (C) years since quitting among former smokers: C ( $n=37$ ),  $\leq 10$  ( $n=18$ ), 11+ ( $n=16$ ), N ( $n=92$ ).

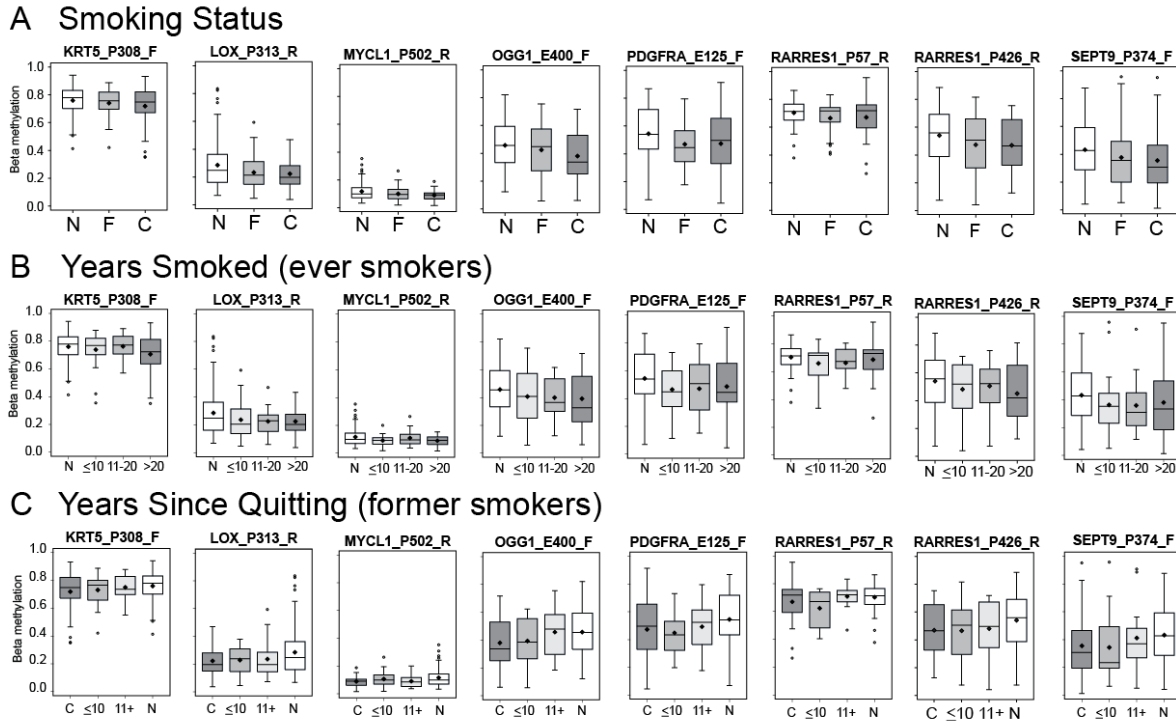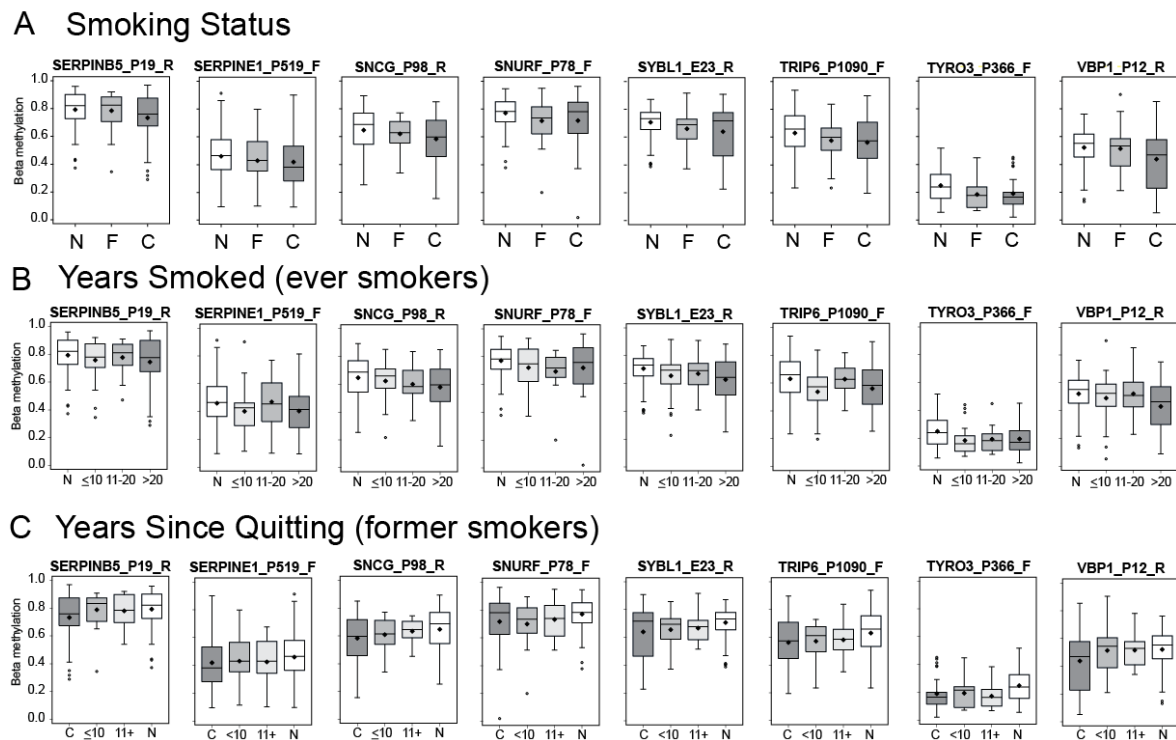

**Figure S3c. Patterns of methylation at CpGs differentially methylated at  $p < 0.05$  in HR+ breast tumors from current versus never smokers.** Methylation differences according to (A) smoking status in current (C) ( $n=82$ ) or former (F) ( $n=86$ ) smokers compared with never smokers (N) ( $n=170$ ), (B) increasing duration of smoking in years among ever smokers: N ( $n=170$ ),  $\leq 10$  ( $n=47$ ), 11-20 ( $n=34$ ), or  $>20$  years ( $n=87$ ), and (C) years since quitting among former smokers: C ( $n=82$ ),  $\leq 10$  ( $n=40$ ), 11+ ( $n=46$ ), N ( $n=170$ ).

**A Smoking Status**

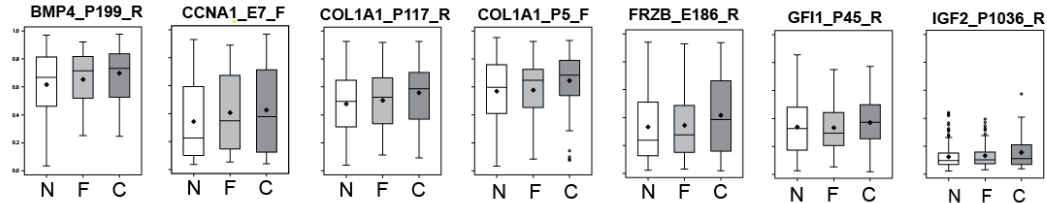

**B Years Smoked (ever smokers)**

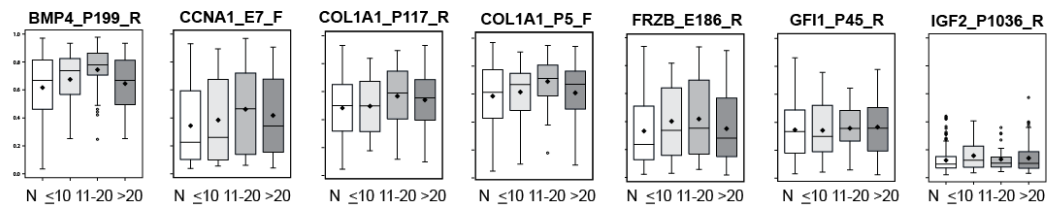

**C Years Since Quitting (former smokers)**

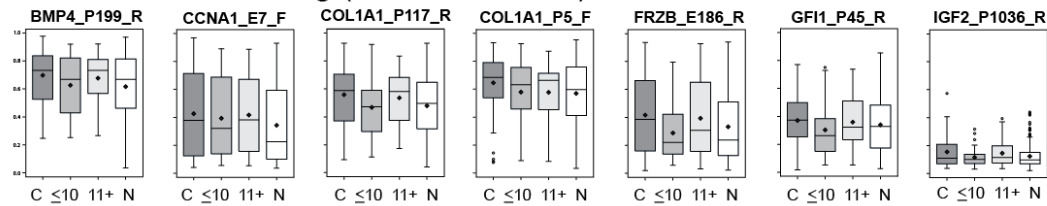

**A Smoking Status**

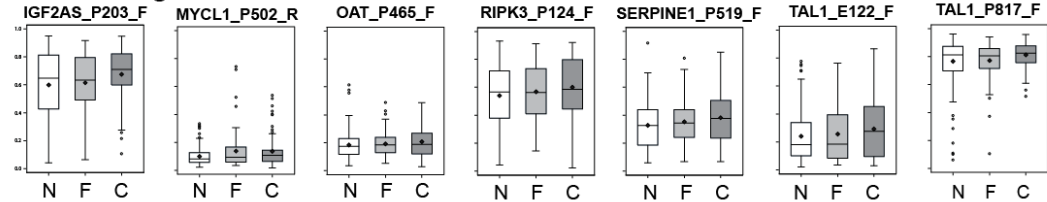

**B Years Smoked (ever smokers)**

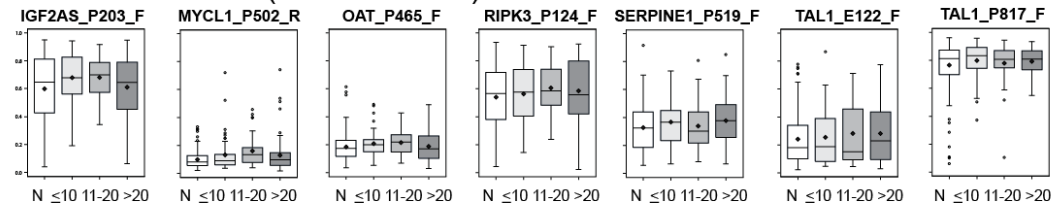

**C Years Since Quitting (former smokers)**

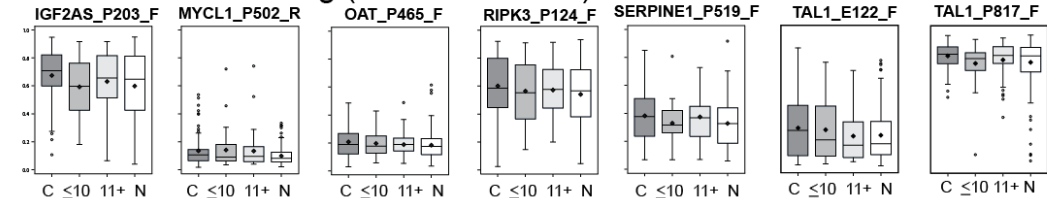

Supplement: NIHMS902559-supplement-10549.pdf [file NIHMS902559-supplement-10549.pdf]
